# Supplementary material for: Transport of lipophilic carboxylates is mediated by transmembrane helix 2 in multidrug transporter AcrB
Source: PubMed Central journal article supplement (PMC5171871; doi:10.1038/ncomms13819), 2016-12-16
Supplement: ncomms13819-s1.pdf [file ncomms13819-s1.pdf]

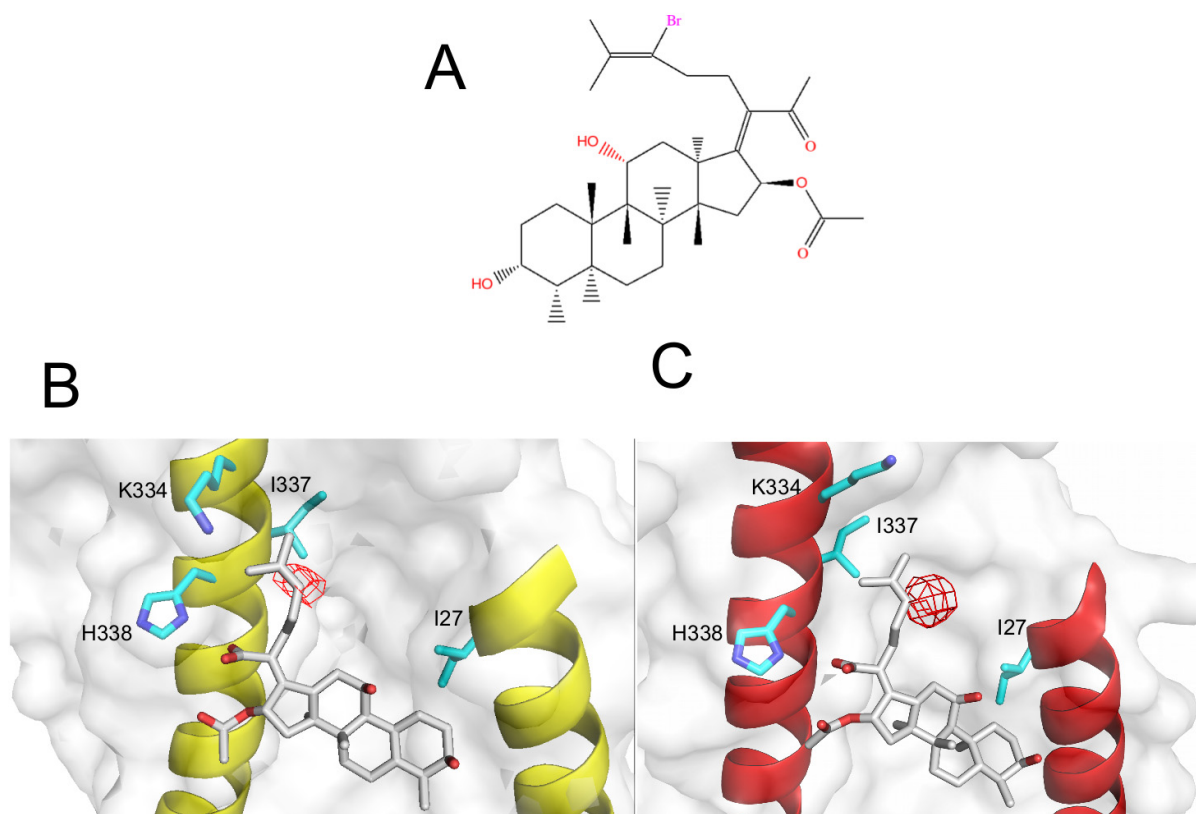

**Supplementary Figure 1 - 24-Bromofusidic acid bound at TM1-TM2**

**A** Chemical structure of 24-bromofusidic acid. **B, C** Anomalous density for the bromine atom at TM1/TM2 in **B** tight and **C** open monomer, contoured at  $5 \sigma$ ,  $1.3098 \text{ e } \text{\AA}^3$  (red mesh). The anomalous signal of the bromine atom is located at position C24.

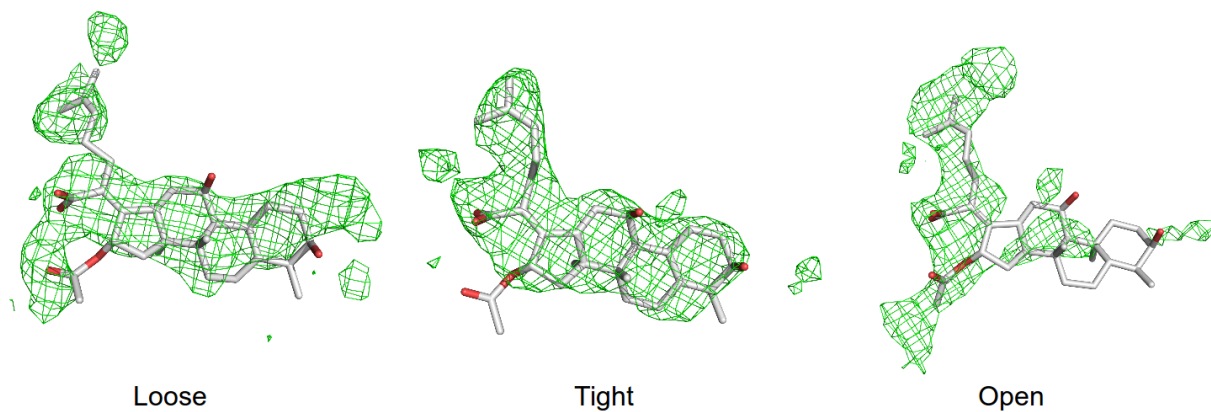

**Supplementary Figure 2 - Polder and Fo-Fc electron density map for fusidic acid at TM2 groove**

Polder maps contoured at 3.5, 4.0 and 3.0  $\sigma$  for fusidic acid bound at loose, tight and open conformer, respectively. Polder maps were calculated by phenix.polder<sup>27</sup>. Fusidic acid is shown as sticks (carbon = white; oxygen = red).

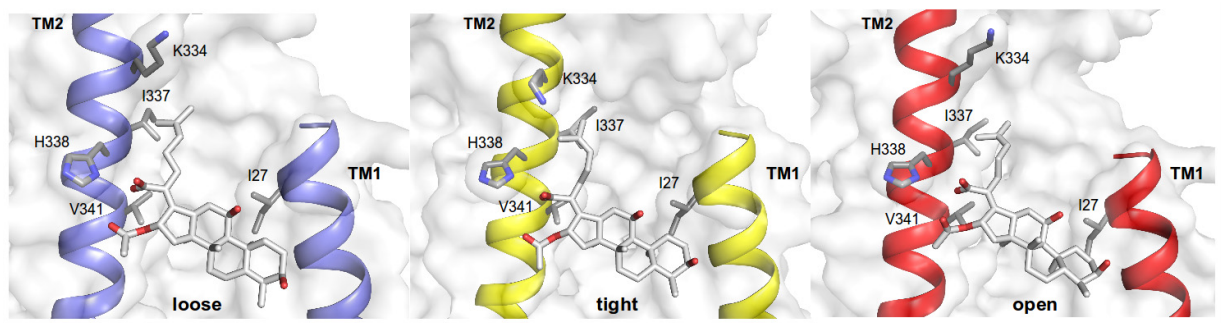

**Supplementary Figure 3 - Localization of fusidic acid in each of the three protomers at the TM1/TM2 groove of asymmetric AcrB**

Fusidic acid (white stick presentation with oxygen atoms in red) between TM1 (right helix) and TM2 (left helix) in the loose (on the left, blue), tight (middle, yellow), and open (right, red) conformer of asymmetric AcrB. On TM1, I27 is indicated as grey stick, on TM2, from top to bottom, K334, I337, H338 and V341 side chains are indicated in grey sticks (N atoms in blue).

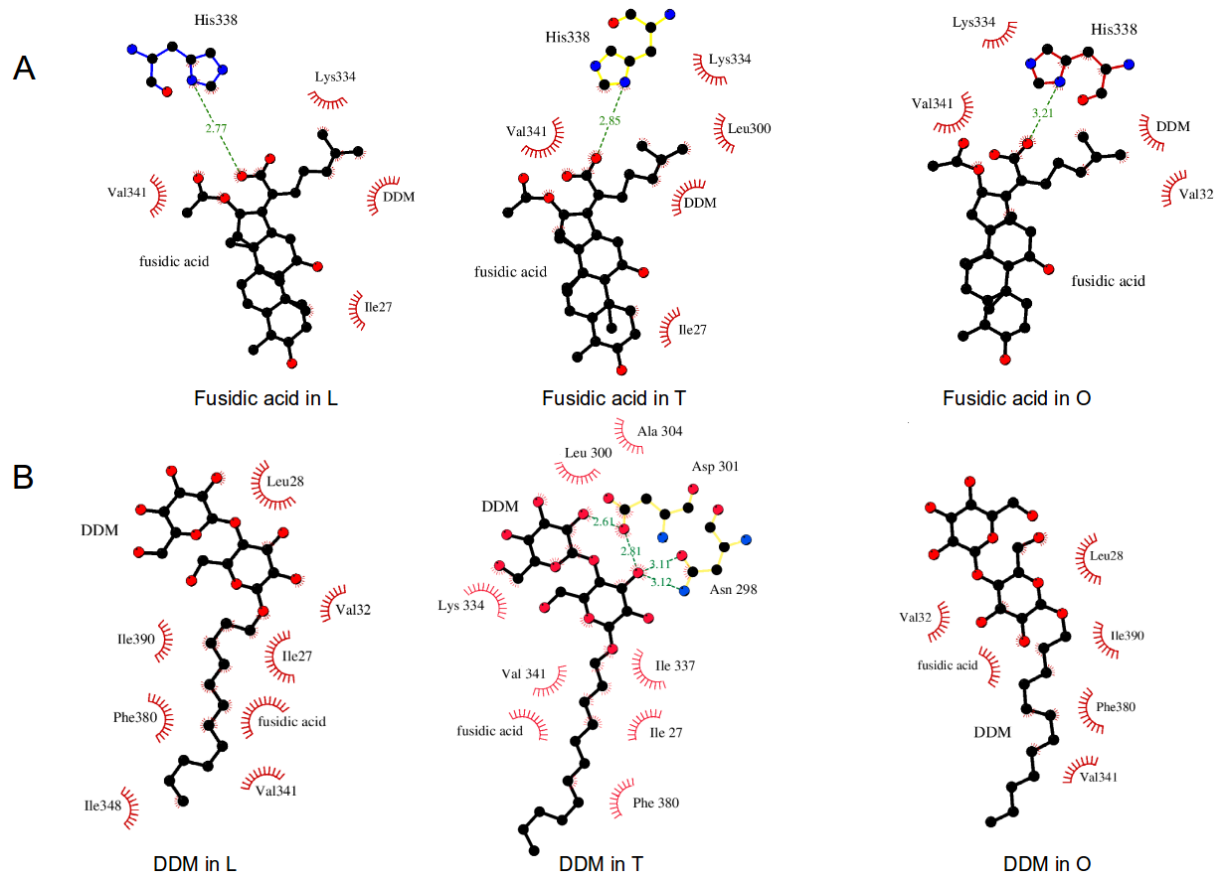

**Supplementary Figure 4 - Ligplot representations of fusidic acid and dodecyl- $\beta$ -D-maltoside binding in the TM1/TM2 area**

**A** Ligand interactions of fusidic acid in the loose (L), tight (T) and open (O) conformer.

**B** Ligand interaction of dodecyl- $\beta$ -D-maltoside in the loose (L), tight (T) and open (O) conformer.

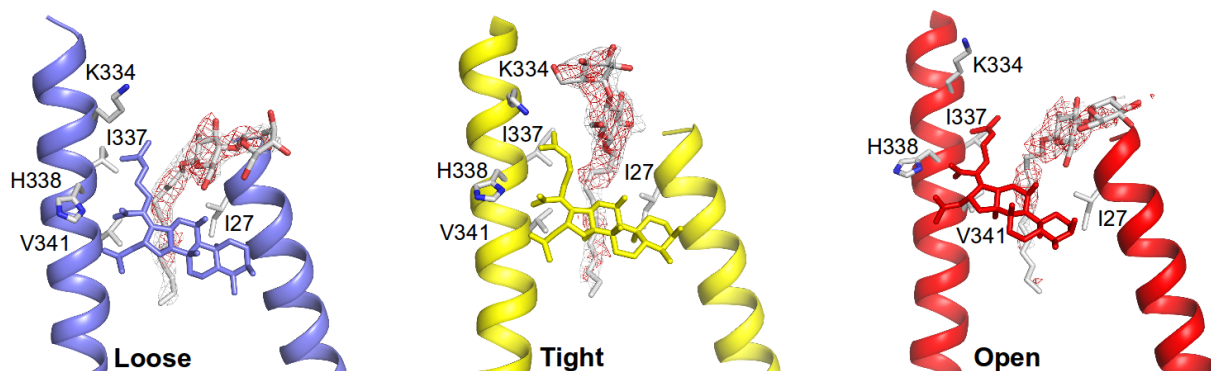

**Supplementary Figure 5 - Densities and assignment to dodecyl- $\beta$ -D-maltoside located at the TM1/TM2 groove**

Observed Fo-Fc and 2Fo-Fc SA composite omit maps. Shown are the Fo-Fc densities (at 2.5, 2.5, and 2.0 sigma, in red mesh), 2Fo-Fc densities (at 1.0 sigma, in grey mesh), and DDM assignment at the TM1/TM2 groove of the Loose (colored in blue), Tight (yellow), and Open (red) protomers, respectively.

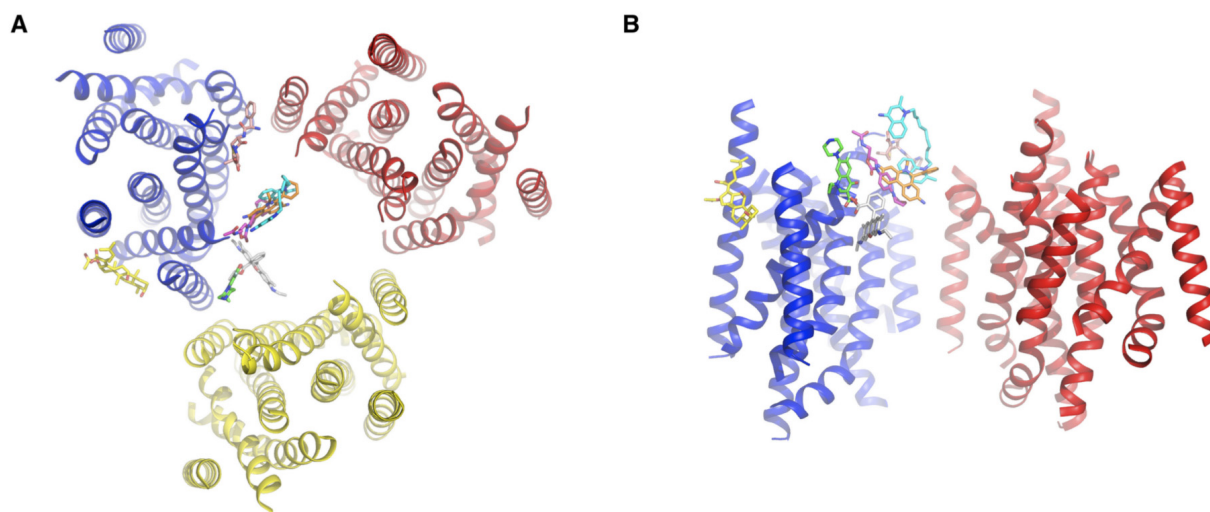

**Supplementary Figure 6 - Superimposition of the L protomer of the symmetric AcrB structures with assigned drug molecules bound at the central cavity with the L protomer of the asymmetric fusidic acid AcrB complex structure**

Symmetric structures of AcrB comprising one monomer in the asymmetric unit were superimposed on the L monomer (blue) of asymmetric AcrB structure with bound fusidic acid (this work, comprising a trimer in the asymmetric unit, L protomer, blue; T protomer, yellow, O protomer, red). The position of substrates from the symmetric structures are shown in colored stick representation: Rhodamine 6G (white, PDB: 1OY8), Ethidium (orange, PDB: 1OY9), Dequalinium (cyan, PDB: 1OYD), Ciprofloxacin (green, PDB: 1OYE), Linezolid (pink, PDB: 4K7Q), Ampicillin (salmon, PDB: 2RDD). Fusidic acid from this work is shown in yellow stick representation. **A** Top view of the transmembrane domain viewed from the periplasm. **B** View parallel to the membrane plane. Here, the T protomer (yellow in A) has been omitted for clarity.

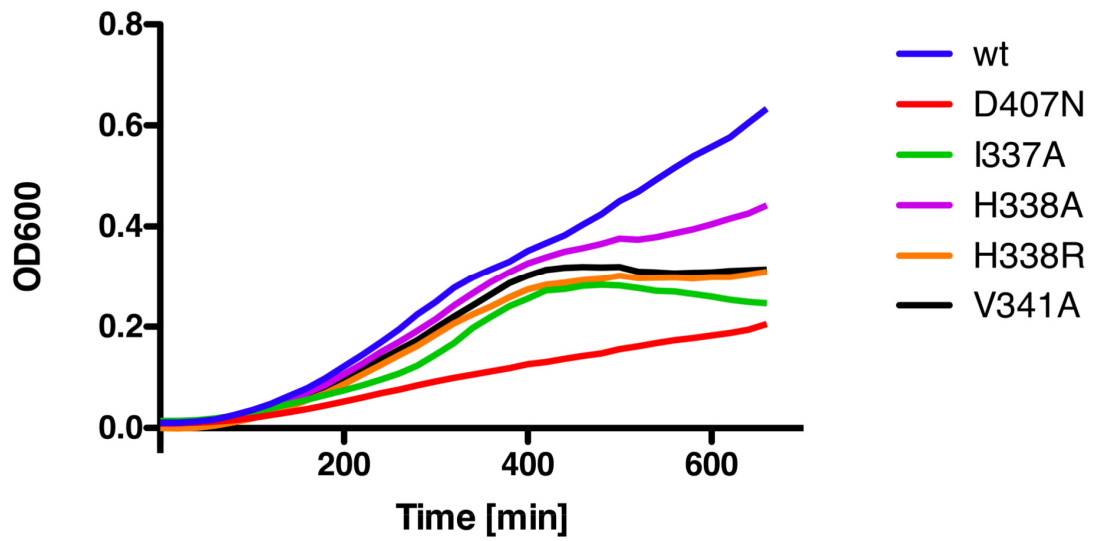

**Supplementary Figure 7 - Phenotypic analysis of AcrB wildtype and TM2 mutants in liquid culture containing 60  $\mu\text{g ml}^{-1}$  fusidic acid**

Representation of growth curves of *E. coli* BW25113  $\Delta$ *acrB* complemented with pET24*acrB* wild type and the indicated mutants on LB supplemented with 60  $\mu\text{g ml}^{-1}$  fusidic acid. The normalized OD<sub>600</sub> is plotted versus time of growth.

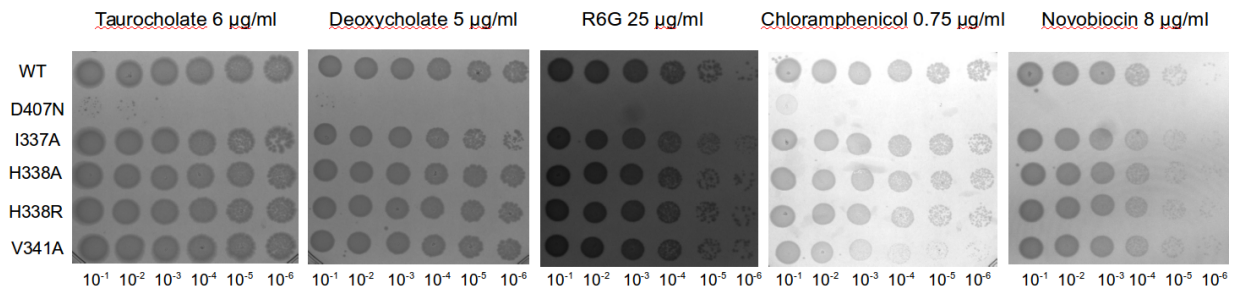

### Supplementary Figure 8 - Drug LB-agar plate dilution test with the indicated AcrB variants

*E. coli* BW25113 $\Delta$ acrB was complemented with *acrB* wildtype or mutant genes expressed from plasmid. For the assay, colonies of these cells were picked and grown over night in LB<sub>Kan50</sub> medium at 37 °C, diluted to OD<sub>600</sub> 10<sup>-1</sup>–10<sup>-6</sup>, and 4 $\mu$ l were spotted on an LB<sub>Kan50</sub> agar plate supplemented with Taurocholate (6  $\mu$ g/ml), Deoxycholate (5  $\mu$ g/ml), Rhodamine-6G (25  $\mu$ g/ml), Chloramphenicol (0.75  $\mu$ g/ml), or Novobiocin (8  $\mu$ g/ml). Comparison between wild type and the D407N mutant (deficient in proton translocation) shows in all variants no difference in resistance, with the exception of V341A in the presence of chloramphenicol. Cell dilutions are indicated at the bottom of each plate.



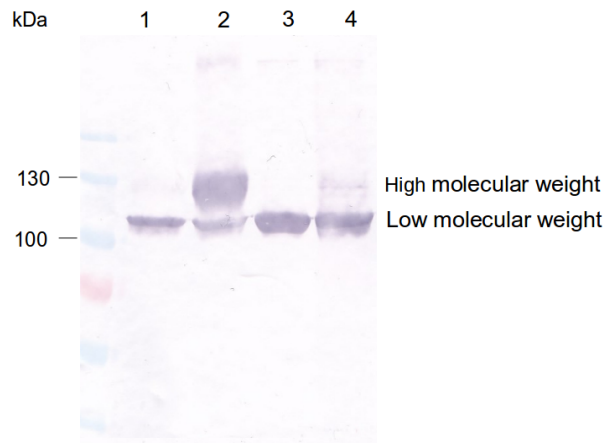

### Supplementary Figure 9 - Determination of the extent of MTS-rhodamine cross-linking to AcrB-cl\_C338

Membranes containing AcrB-cl\_C338 were treated as described in Materials and Methods. Briefly, membranes (80  $\mu$ l) were washed with cross-linking buffer (CLB), and incubated with either MTS-rhodamine (20  $\mu$ M) or *N*-ethylmaleimide (NEM, 5 mM) in the absence of AcrB substrate for 15 min on ice. After addition of 420  $\mu$ l ice-cold CLB excess thiol-reactive reagent was removed by centrifugation. Subsequently, membranes were resuspended in CLB (80  $\mu$ l) containing 1.5% SDS and methoxypolyethylene glycol maleimide (average molecular weight =  $\sim$ 5000) (MAL-PEG, 3 mM) and incubated at room temperature for 2 h. As a positive control, membranes without prior treatment with NEM or MTS-rhodamine were treated with MAL-PEG in parallel. Membranes without addition of thiol-reactive reagents were used as a negative control. Samples were analyzed by SDS-PAGE and Western blot using  $\alpha$ -His antibody as probe. Lane 1: Detection of AcrB-cl\_C338 without NEM, MTS-rhodamine, or MAL-PEG treatment; 2: Detection of MAL-PEG only treated AcrB-cl\_C338 sample; 3: NEM+MAL-PEG treated sample; 4: MTS-rhodamine + MAL-PEG treated sample.

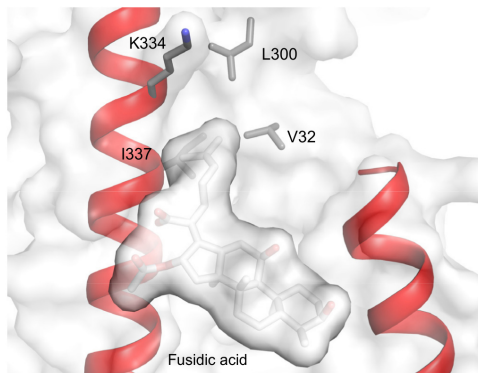

**Supplementary Figure 10 - Fusidic acid localization proximal to a hydrophobic area in the AcrB O monomer**

In the O conformer, fusidic acid is localized proximal to a hydrophobic pocket, comprising V32, L300, K334 and I337 (as indicated).

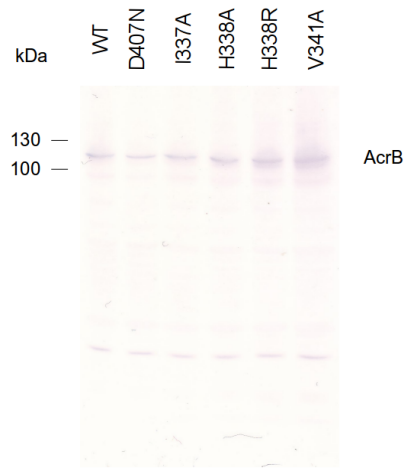

Supplementary Figure 11 – Uncropped image of Figure 4a

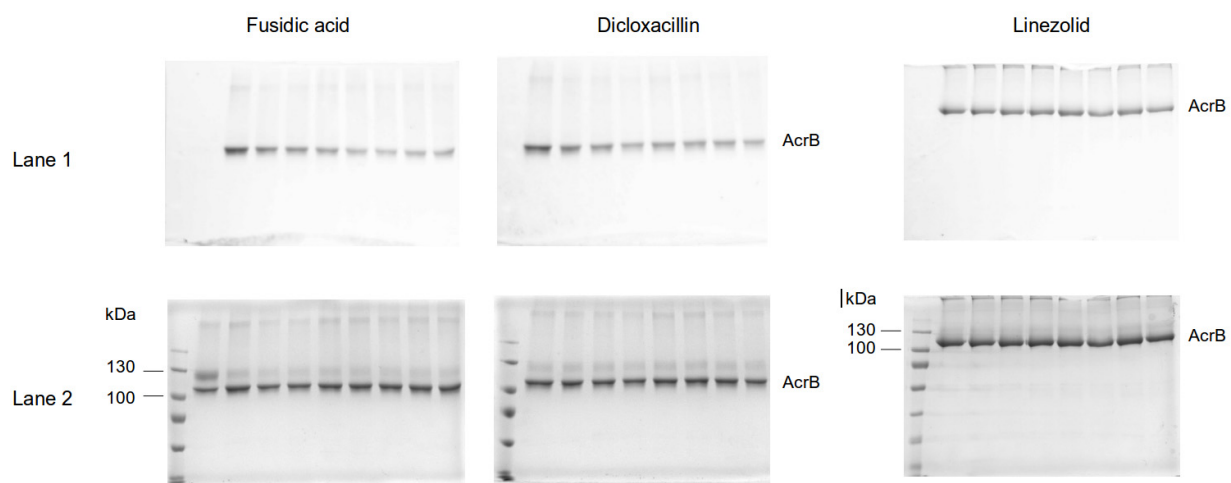

**Supplementary Figure 12 – Uncropped images of Figure 5 for in-gel fluorescence (Lane 1) and Coomassie-stained SDS-PAGE analysis of MTS-rhodamine modified AcrB-cl\_C338 (Lane 2)**

In Lane 2, Row 2 of fusidic acid is AcrB-cl\_C338 sample labeled with MAL-PEG. This is a control to show that C338 is able to react with thiol-reactive compounds.

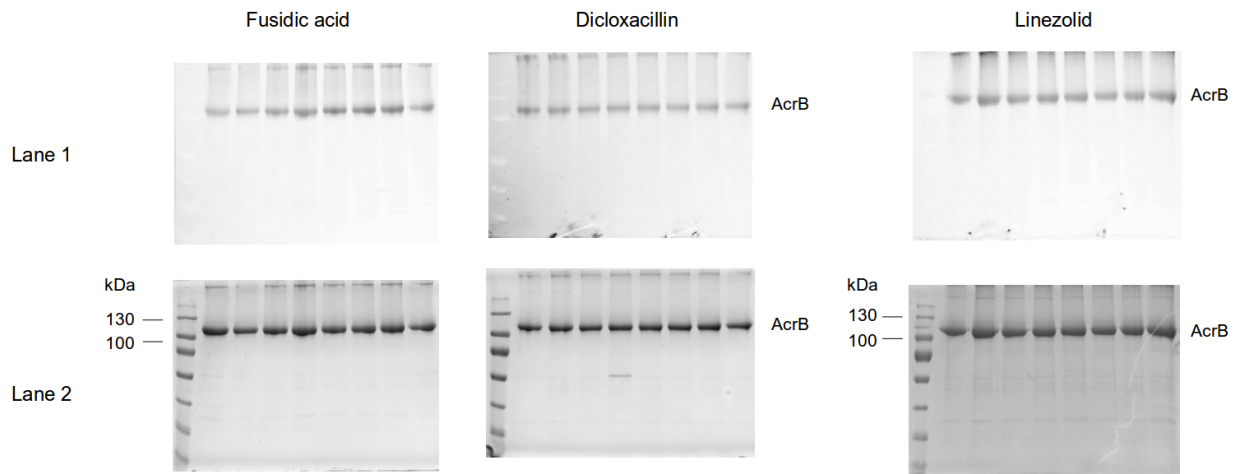

**Supplementary Figure 13 – Uncropped images of Figure 5 for in-gel fluorescence (Lane 1) and Coomassie-stained SDS-PAGE analysis of MTS-rhodamine modified AcrB-cl\_C14 (Lane 2)**

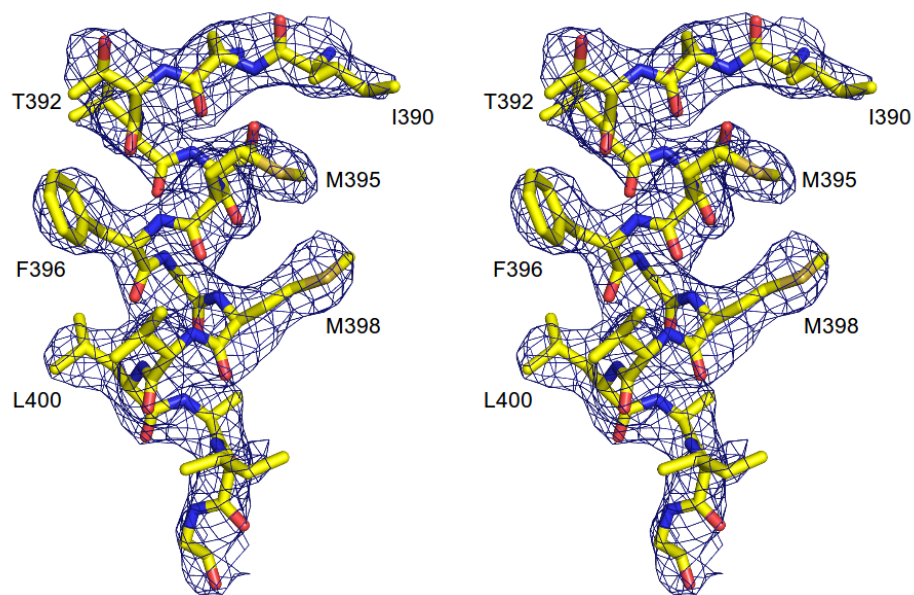

**Supplementary Figure 14 – Stereo image of a representative portion of the electron density map of AcrB/DARPin in complex with fusidic acid.** Residues 390-403 are shown in stick representation with the 2Fo-Fc electron density map of that region contoured at  $1.2\sigma$  (blue mesh).

**Supplementary Table 1 - Data collection and refinement statistics**

|                                                     | AcrB/DARPin in complex<br>with fusidic acid           | AcrB/DARPin in complex<br>with<br>24-bromofusidic acid |
|-----------------------------------------------------|-------------------------------------------------------|--------------------------------------------------------|
| <b>Data collection</b>                              |                                                       |                                                        |
| Space group                                         | <i>P</i> 2 <sub>1</sub> 2 <sub>1</sub> 2 <sub>1</sub> | <i>P</i> 2 <sub>1</sub> 2 <sub>1</sub> 2 <sub>1</sub>  |
| Cell dimensions                                     |                                                       |                                                        |
| <i>a</i> , <i>b</i> , <i>c</i> (Å)                  | 145.65, 163.25, 246.04                                | 145.49, 163.54, 245.10                                 |
| $\alpha$ ; $\beta$ ; $\gamma$ (°)                   | 90.0, 90.0, 90.0                                      | 90.0, 90.0, 90.0                                       |
| Resolution (Å)                                      | 49.12– 2.50 (2.54–2.50)*                              | 49.02– 2.60 (2.64-2.60)                                |
| <i>R</i> <sub>merge</sub>                           | 0.158 (2.290)                                         | 0.259 (2.228)                                          |
| <i>I</i> / $\sigma$ <i>I</i>                        | 9.9 (0.8)                                             | 10.6 (1.5)                                             |
| Completeness (%)                                    | 100.0 (99.9)                                          | 100.0 (100.0)                                          |
| Redundancy                                          | 6.7 (6.7)                                             | 13.5 (13.6)                                            |
| <b>Refinement</b>                                   |                                                       |                                                        |
| Resolution (Å)                                      | 2.5                                                   |                                                        |
| No. reflections                                     | 192130                                                |                                                        |
| <i>R</i> <sub>work</sub> / <i>R</i> <sub>free</sub> | 22.49 / 26.15                                         |                                                        |
| No. atoms                                           |                                                       |                                                        |
| Protein                                             | 25948                                                 |                                                        |
| Ligand/ion                                          | 874                                                   |                                                        |
| Water                                               | 815                                                   |                                                        |
| <b>B-factors</b>                                    |                                                       |                                                        |
| Protein                                             | 62.62                                                 |                                                        |
| Ligand/ion                                          | 108.47                                                |                                                        |
| Water                                               | 45.65                                                 |                                                        |
| R.m.s. deviations                                   |                                                       |                                                        |
| Bond length (Å)                                     | 0.0069                                                |                                                        |
| Bond angles (°)                                     | 1.1048                                                |                                                        |

Number of crystals for each structure =1. \* Highest resolution shell is shown in parenthesis.

**Supplementary Table 2 - Primer sequences (PHO: phosphorylated at 5' end)**

| <b>Plasmid</b>                 | <b>Primer sequences</b>                                                                                                              |
|--------------------------------|--------------------------------------------------------------------------------------------------------------------------------------|
| pET24acrB <sub>His</sub>       | AcrBfor (5'-GGATCCCATATGCCTAATTTCTTTATCGATC-3')<br>acrBrev (5'-AAGCTTCTCGAGATGATGATCGACAGTATGGCTG-3')                                |
| pET24acrB-I337A <sub>His</sub> | For_AcrB_I337A (5'-AAGCTTCTCGAGATGATGATCGACAGTATGGCTG-3')<br>rev_AcrB337-338 (5'PHO-GAACGGCGTGGTGCATATGGGTAAAC-3)                    |
| pET24acrB-H338A <sub>His</sub> | For_AcrB_H338A (5'-GTGAAAATCTCTATTGCCGAAGTGGTAAAACGC-3')<br>rev_AcrB337-338 (5'PHO-GAACGGCGTGGTGCATATGGGTAAAC-3)                     |
| pET24acrB-H338R <sub>His</sub> | For_AcrB_H338R (5'-GTGAAAATCTCTATTAGAGAAGTGGTAAAACGC-3')<br>rev_AcrB337-338 (5'PHO-GAACGGCGTGGTGCATATGGGTAAAC-3)                     |
| pET24acrB-V341A <sub>His</sub> | For_AcrB_V341A (5'-CGAAGTGGCAAAAACGCTGGTCGAAGCGATCATCCTCGTTCCTGG-3')<br>rev_AcrB341 (5'PHO-TGAATAGAGATCTTACGAACGGCGTGGTGCATATGGG-3') |



## Supplementary Methods

### Abbreviations:

|                                   |                                         |
|-----------------------------------|-----------------------------------------|
| ACN:                              | Acetonitrile                            |
| Br <sub>2</sub> :                 | Bromine liquid                          |
| CCl <sub>4</sub> :                | Carbon tetrachloride                    |
| DBU:                              | 1,8-Diazabicyclo[5.4.0]undec-7-ene      |
| DCM:                              | Dichloromethane                         |
| DMF:                              | N,N-Dimethylformamide                   |
| EA                                | Ethyl acetate                           |
| eq.:                              | Equivalent                              |
| EtOH:                             | Ethanol                                 |
| HPLC:                             | High performance liquid chromatography  |
| KH <sub>2</sub> PO <sub>4</sub> : | Potassium dihydrogen phosphate          |
| LC-MS:                            | Liquid chromatography mass Spectroscopy |
| MeOH                              | Methanol                                |
| NaOH:                             | Sodium hydroxide                        |
| Na <sub>2</sub> SO <sub>4</sub> : | Sodium sulfate                          |
| NMR:                              | Nuclear magnetic resonance              |
| PE                                | Petroleum ether                         |
| R <sub>f</sub> :                  | Retention factor in chromatography      |
| R <sub>t</sub> :                  | Retention time                          |
| R.T.:                             | Room temperature                        |
| SCRC:                             | Sinopharm Chemical Reagent Co., Ltd.    |
| TEA:                              | Triethylamine                           |
| TFA:                              | Trifluoroacetic acid                    |
| TLC:                              | Thin layer chromatography               |
| Tol.:                             | Toluene                                 |

## 1. Deliverable of BC1102

### 1.1 Original deliverables:

Basilea China shall synthesize **24-Bromo-fusidic acid sodium salt BC1111** and deliver 50-100 mg to Basilea Pharmaceutica International Ltd.:

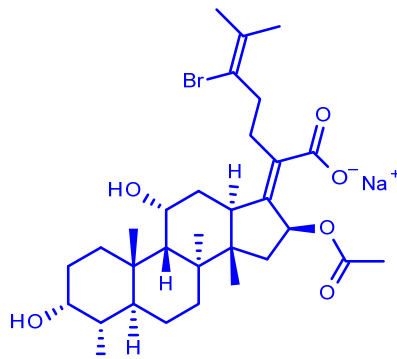

**BC1111**  
**BAL0117224**

## 2. Synthesis of BC1111

### 2.1 General comment

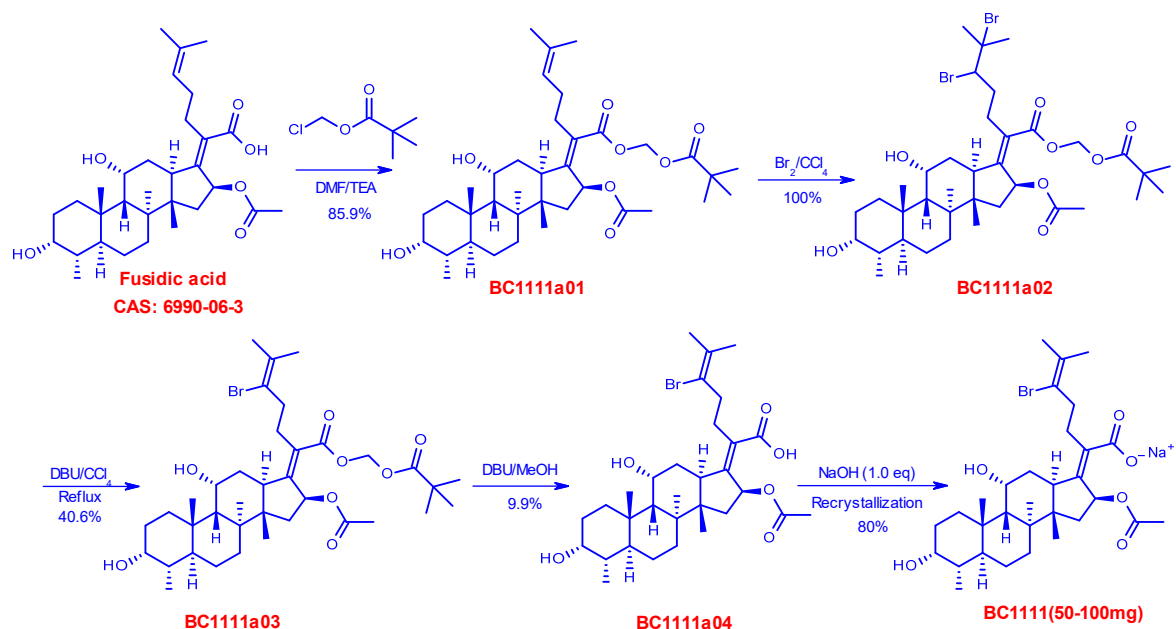

### Reference:

Patent: WO2005/007669A1

**Instrumentation:** All reagents and solvents were of commercial quality and used without further purification unless otherwise noted. The NMR spectra were obtained with a Bruker AVANCE III 400 MHz spectrometer using  $\text{CDCl}_3$  or  $\text{DMSO-d}_6$  as solvent. The chemical shifts are expressed in ppm with  $\text{CDCl}_3$  or  $\text{DMSO-d}_6$  as internal standard. MS (ESI-MS) was recorded on a Waters UPLC H-Class with SQD2 MS spectrometer (Instrument No.03) or Waters 2695/2998 HPLC with SQD MS spectrometer (Instrument No.39). Purity of the products were checked using a Agilent 1200 series instrument (Instrument No.21) equipped with a SunFire™ C18 (3.5 $\mu\text{m}$ ), 150 $\times$ 4.6 mm column. Peaks were detected at 254 nm or 230 nm or 210 nm absorption. Thin layer chromatography (TLC) was performed using glass plates pre-coated with silica gel GF<sub>254</sub> with a layer thickness of 0.25 mm purchased from Tsingdao Haiyang Co. Ltd. The conditions for <sup>1</sup>H NMR, LC-MS are listed below unless otherwise noted. The HPLC conditions are listed in the analytical data respectively.

**NMR analysis**

Varian: MercuryPlus-400M

Bruker: AVANCE III 400

Solvent: CDCl<sub>3</sub> or DMSO-d<sub>6</sub>

**Method A:****LC-MS: Instrument No. 03**

**Instrument:** LC/MS system (Instrument No. 33)

Agilent 1100 Series

**Components:** G1310A/G1315B/G1313A/G1946D

Agilent software (Agilent ChemStations Ver.A. 10.02[1757] )

**Pump A:** Water (prepared using a Millipore ultra pure water system) with 0.1% formic acid

**Pump B:** ACN (LC-MS grade) with 0.1% formic acid

**Column:** Agilent SB-C18 (3.5 μm), 4.6 mmx50mm

**Column temp:** room temperature

**Detection:** DAD

**Flow:** 1.5 mL/min

**Gradient program:**

| Step | Time (min) | Phase A (%) | Phase B (%) | Comments        |
|------|------------|-------------|-------------|-----------------|
| 1    | 0          | 90          | 10          | Equilibration   |
| 2    | 1          | 90          | 10          | Linear gradient |
| 3    | 4          | 5           | 95          |                 |
| 4    | 5.5        | 5           | 95          |                 |

**Method B:****LC-MS:****Instrument No. 39**

**Instrument:** LC/MS system (Instrument No. 39)

Waters 2695/2998 HPLC with SQD MS

Waters Empower2 software

Pump A: Water (prepared using a Millipore ultra pure water system, resistivity: 18.2 MΩ.CM) with 0.1% formic acid

Pump B: ACN (LC-MS grade) with 0.1% formic acid

Column: Atlantis® T3 (3 μm), 100×4.6 mm

Column temp: 30 °C

Detection: λ= 254 nm, 230 nm and 218 nm/PDA

Flow: 1.0 mL/min

Gradient elution program:

| Step | Time (min) | Phase A (%) | Phase B (%) | Comments        |
|------|------------|-------------|-------------|-----------------|
| 1    | 0          | 95          | 5           | Equilibration   |
| 2    | 1          | 95          | 5           | Linear gradient |
| 3    | 13         | 5           | 95          |                 |
| 4    | 15         | 5           | 95          |                 |

### Method C :

#### HPLC: Instrument No. 09

HPLC method description:

Instrument: Agilent 1100 Series (HPLC09)

Agilent software (Agilent ChemStations Rev.A. 10.02[1757])

Pump A: Water (prepared using a Millipore ultra pure water system, resistivity: 18.2MΩ.CM) with 10mM K<sub>2</sub>HPO<sub>4</sub> (pH=7.2)

Pump B: Acetonitrile (Ourchem®, HPLC grade)

Column: Atlantis® T3 (3μm), 150×4.6 mm

Column temp: R. T.

Sample conc: 0.8mg/mL

Injection vol: 8μL

Detection: λ= 254nm, and 230nm, and 210nm/DAD

Flow: 1.0mL/min

Gradient program:

| Step | Time (min) | Phase A (%) | Phase B (%) | Comments |
|------|------------|-------------|-------------|----------|
|------|------------|-------------|-------------|----------|

|   |      |    |    |                 |
|---|------|----|----|-----------------|
| 1 | 0    | 45 | 55 | Equilibration   |
| 2 | 1    | 45 | 55 | Linear gradient |
| 3 | 13   | 5  | 95 |                 |
| 4 | 16.5 | 5  | 95 |                 |
| 5 | 17   | 95 | 5  |                 |

**Method D:**

**HPLC: Instrument No. 21**

HPLC method description:

Instrument: Agilent 1200 Series (HPLC21)

Agilent software (ChemStation for LC 3D system B.04.02 SP1 [208])

Pump A: Water (prepared using a Millipore ultra pure water system, resistivity: 18.2 MΩ.CM) with 0.1% TFA

Pump B: ACN (Ourchem®, HPLC grade) with 0.1% TFA

Column: Prontosil 120-3-C18-SH (3 μm) 150×4.6 mm

Column temp: room temperature

Detection: λ= 230 nm and 210 nm/DAD

Flow: 1.0 mL/min

Gradient program:

| Step | Time (min) | Phase A (%) | Phase B (%) | Comments        |
|------|------------|-------------|-------------|-----------------|
| 1    | 0          | 98          | 2           | Equilibration   |
| 2    | 5          | 98          | 2           | Linear gradient |
| 3    | 18         | 62          | 38          |                 |
| 4    | 25         | 5           | 95          |                 |
| 5    | 30         | 5           | 95          |                 |

## 2.2 Synthesis of BAL0117224 (BC1111)

### 2.2.1 Synthesis of BC1111a01

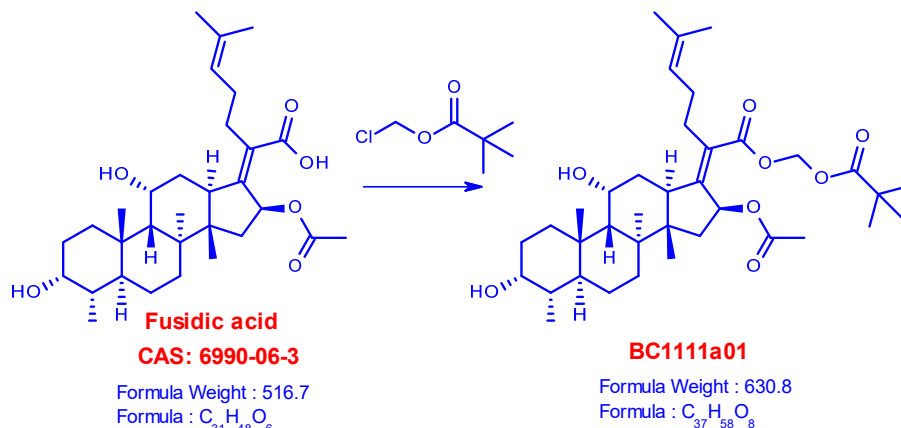

#### 2.2.1.1 General comment

The product was obtained in 85.9% yield after purification.

#### Reference:

Patent: WO2005/007669A1

#### 2.2.1.2 Experimental Procedure

Lab Journal No.: JIANL-180-1

Experiment No.: JIBC1111a01-001

Under nitrogen atmosphere, in a 100 mL round-bottomed flask, a mixture of

|       |    |                                                                         |
|-------|----|-------------------------------------------------------------------------|
| 13.01 | g  | of <u>Fusidic acid</u> (note 1, 25.18 mmol, 1.0 eq.) and                |
| 3.31  | g  | of <u>TEA</u> (note 2, 32.74 mmol, 1.3 eq.) in                          |
| 38    | mL | of <u>DMF</u> (note 3) was stirred at 25°C for 30 minutes. Then         |
| 5.31  | g  | of <u>Chloromethyl pivalate</u> (note 4, 35.26 mmol, 1.4 eq.) was added |

dropwise at 25°C over 25 minutes. After addition, the reaction mixture was stirred at 50°C for 18 hours. When TLC showed that the reaction was complete, the mixture was cooled to 25°C and then concentrated under vacuum. The residue was purified by silica gel column chromatography eluting with PE/EA=3/1 (TLC: PE/EA=3/1, R<sub>f</sub>=0.25) to give

13.65 g of the product as a white foam.

**Product:** 13.65 g

**Yield:** 85.9%

### Notes

1. Industrial grade
2. SCRC
3. SCRC
4. SCRC

### Analytical Methods

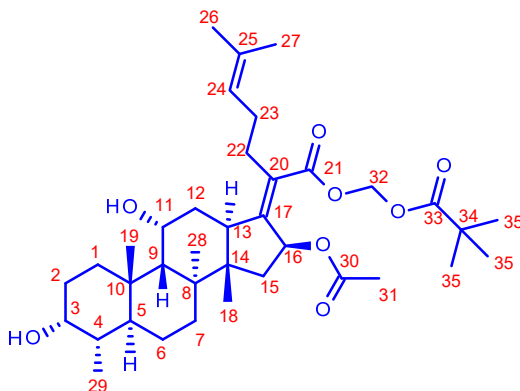

**<sup>1</sup>H NMR** (400 MHz, CDCl<sub>3</sub>) δ ppm: 5.85 (d, *J*=8.4Hz, 1H, H-16), 5.69, 5.78 (AB, *J*=5.6Hz, 2H, H-32), 5.07 (t, *J*=7.2Hz, 1H, H-24), 4.33 (s, 1H, H-3), 3.74 (s, 1H, H-11), 3.04 (d, *J*=11.2Hz, 1H, H-13), 2.35-2.52 (m, 2H, H-2(1H), 12(1H)), 2.25-2.35 (m, 1H, H-4), 2.05-2.20 (m, 4H, H-22, 23), 1.95-2.05 (m, 1H, H-15(1H)), 1.97 (s, 3H, H-31), 1.46-1.90 (m, 8H, H-1(1H), 2(1H), 5, 6, 7(1H), 12(1H), 15(1H)), 1.66 (s, 3H, H-26), 1.58 (s, 3H, H-27), 1.36 (s, 3H, H-28), 1.29 (d, *J*=14.4Hz, 1H, H-9), 1.20 (s, 9H, H-35), 1.00-1.19 (m, 2H, H-1(1H), H-7(1H)), 0.96 (s, 3H, H-18), 0.85-0.95 (m, 6H, H-19, 29)

#### **2.2.1.3 Analytical data**

**<sup>1</sup>H NMR analysis: Varian: MercuryPlus-400M**

Solvent: CDCl<sub>3</sub>



# basilea NMR of BC1111a01

PHARMACEUTICA

BC1111 Div.3

Proposed Structure:

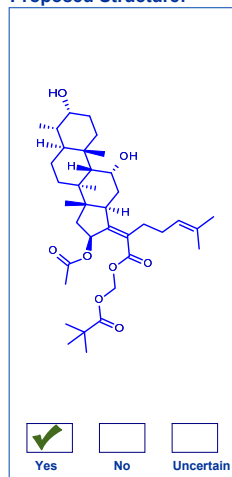

Solvent: CDCl<sub>3</sub>  
 Producer: JIAN L  
 Analyst: Alain  
 Date: 20131106  
 Analysis No: AN1301013192  
 Comment: OA01  
 ELN No: JIANL-180-1

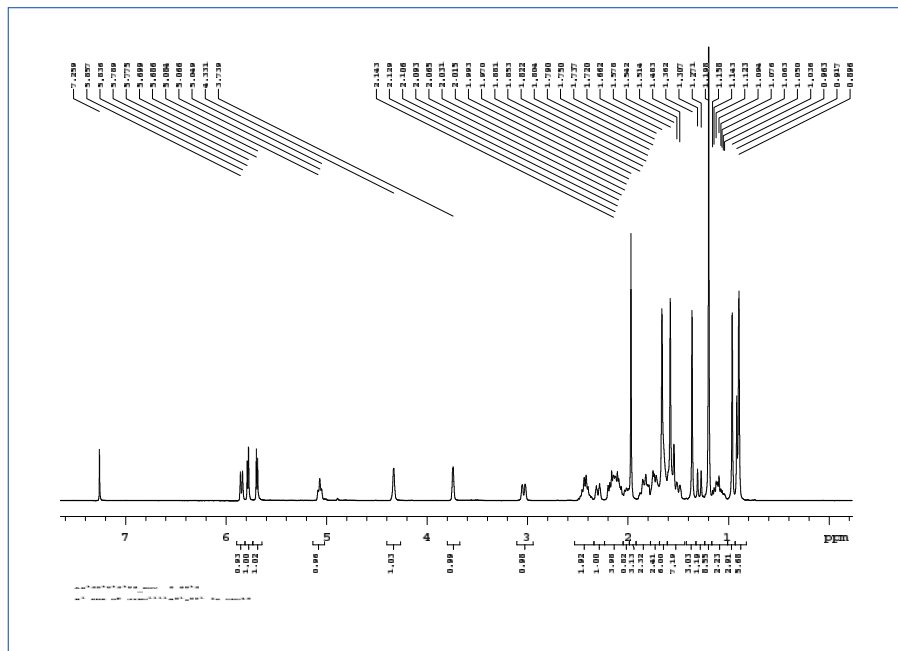

## 2.2.2 Synthesis of BC1111a02

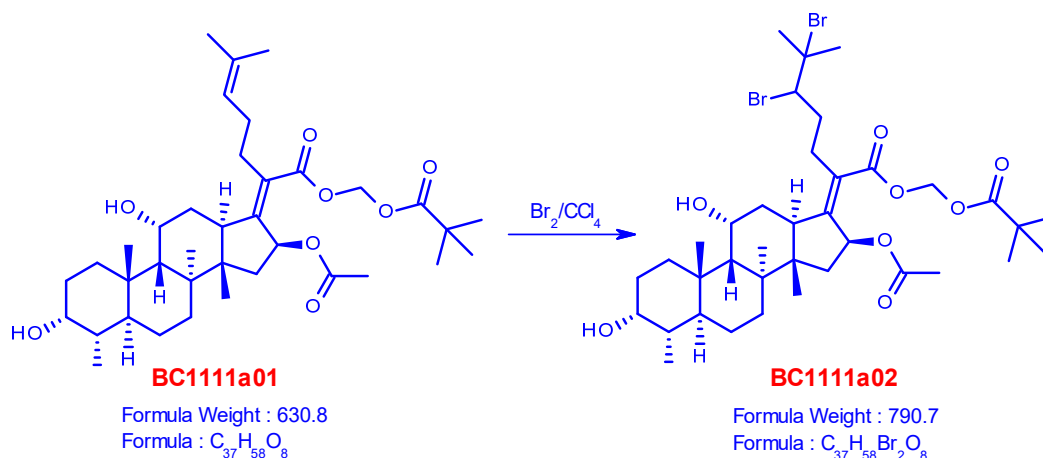

### 2.2.2.1 General comment

The experimental result indicated that the product was labile over silica gel. Thus the crude product was used directly in the next step without further purification after work up. The crude product was analyzed by LCMS but it couldn't be ionized.

**Reference:**

Patent: WO2005/007669A1

**2.2.2.2 Experimental Procedure****Lab Journal No.: JIANL-189-1****Experiment No.: JIBC1111a02-003**

Under nitrogen atmosphere, in a 250 mL round-bottomed flask,  
7.15 g of BC1111a01 (note 1, 11.33 mmol, 1.0 eq.) was dissolved in  
40 mL of CCl<sub>4</sub> (note 2) and the resulting mixture was cooled to -10°C. Then a  
solution of  
1.99 g of Br<sub>2</sub> (note 3, 12.47 mmol, 1.1 eq.) in  
40 mL of CCl<sub>4</sub> (note 2) was dropwise added in the course of 1 hour with  
continuous stirring at -10°C. After addition, the resulting reaction mixture  
was further stirred at -10°C for 1 hour. When TLC showed that the  
reaction was complete, the mixture was concentrated under vacuum to  
give the crude product as a light yellow foam. The crude product was  
used directly in the next step without further purification.

**Product:** 8.95 g

**Yield:** 100%

**Notes**

1. JIANL-180-1
2. SCRC, dried over 4 Å molecular sieve
3. SCRC

### 2.2.3 Synthesis of BC1111a03

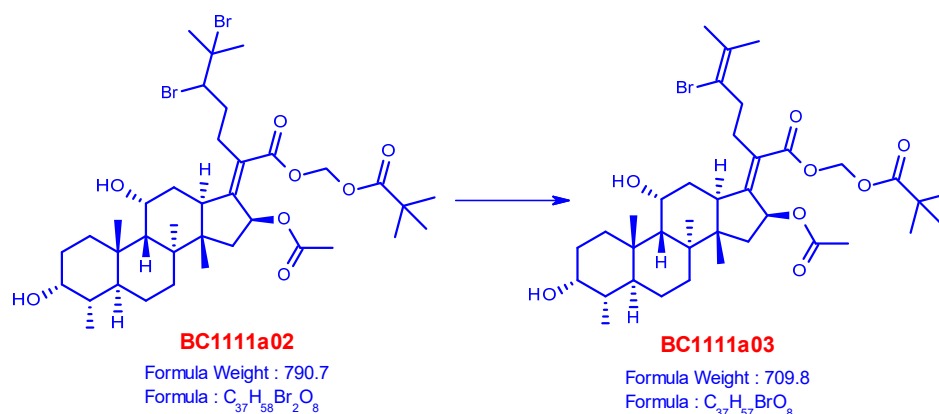

#### 2.2.3.1 General comment

The product was prepared in about 40% yield after purification by silica gel column chromatography.

#### Reference:

Patent: WO2005/007669A1

#### 2.2.3.2 Experimental Procedure

Lab Journal No.: JIANL-185-1

Experiment No.: JIBC1111a03-002

Under Argon atmosphere, to a solution of

|      |    |                                                                                                                                                                                                                                     |
|------|----|-------------------------------------------------------------------------------------------------------------------------------------------------------------------------------------------------------------------------------------|
| 3.78 | g  | of <u>BC1111a02</u> (note 1, 4.78 mmol, 1.0 eq.) in                                                                                                                                                                                 |
| 50   | mL | of <u>CCl<sub>4</sub></u> (note 2) was added                                                                                                                                                                                        |
| 1.46 | g  | of <u>DBU</u> (note 3, 9.56 mmol, 2.0 eq.). The mixture was refluxed at 77°C for 16 hours. Then the reaction mixture was filtered through Celite. The filter cake was washed with                                                   |
| 100  | mL | of PE and                                                                                                                                                                                                                           |
| 100  | mL | of EA successively. The combined filtrate and washings were concentrated under reduced pressure. The residue was purified by silica gel column chromatography eluting with PE/EA=5/1 (TLC: PE/EA=3/1, R <sub>f</sub> =0.25) to give |
| 1.29 | g  | of the product as a light yellow foam.                                                                                                                                                                                              |

**Product:** 1.29 g

**Yield:** 38.1%

### **Notes**

1. JIANL-184-1
2. SCRC, anhydrous
3. SY-001471

### **Analytical Methods**

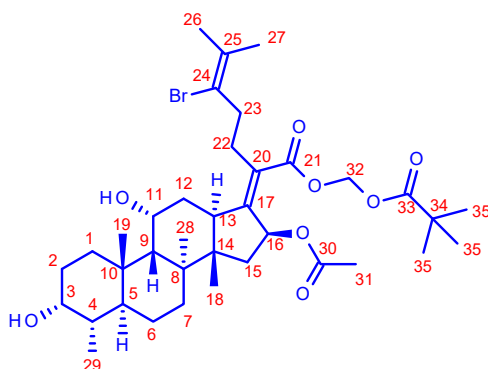

**<sup>1</sup>H NMR** (400 MHz, CDCl<sub>3</sub>) δ ppm: (the sample was not clean) 5.85 (m, 1H, H-16), 5.68, 5.82 (AB, 2H, H-32), 4.35 (s, 1H, H-3), 3.72 (s, 1H, H-11), 3.02-3.12 (m, 1H, H-13), 2.06-2.22, 2.35-2.58 and 2.58-2.75 (3m, 7H, H-2(1H), 4, 12(1H), 22, 23), 1.92-2.00 (m, 4H, H-15(1H), 31), 1.45-1.65 and 1.65-1.92 (m, 8H, H-1(1H), 2(1H), 5, 6, 7(1H), 12(1H), 15(1H)), 1.85 (s, 3H, H-26), 1.75 (s, 3H, H-27), 1.36 (s, 3H, H-28), 1.25-1.32 (m, 1H, H-9), 1.24 (s, 9H, H-35), 1.03-1.20 (m, 2H, H-1(1H), 7(1H)), 0.96 (s, 3H, H-18), 0.85-0.95 (m, 6H, H-19, 29)

#### **2.2.3.3 Analytical data**

**<sup>1</sup>H NMR analysis: Varian: MercuryPlus-400M**

Solvent: CDCl<sub>3</sub>

# basilea NMR of BC1111a03

PHARMACEUTICA

BC1111 Div.3

Proposed Structure:

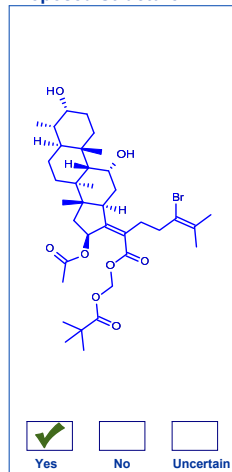

Solvent: CDCl<sub>3</sub>  
Producer: JIAN L  
Analyst: Alain  
Date: 20131112  
Analysis No: AN1301013313  
Comment: OA01  
ELN No: JIANL-185-1

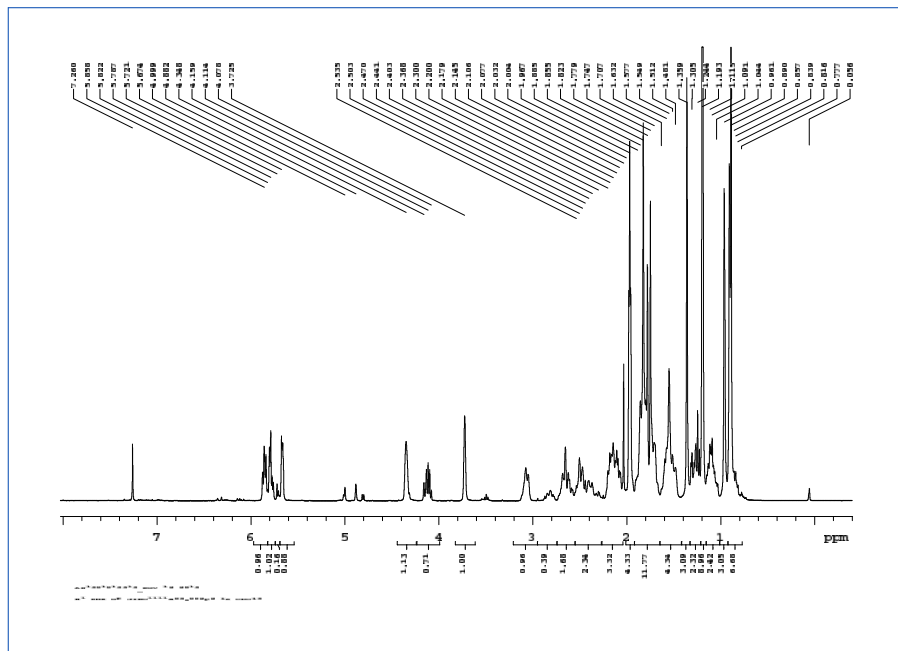

ANALYTICAL DATA SHEET (Basilea China)

J/JPD-ANA-002[01]

## 2.2.4 Synthesis of BC1111a04

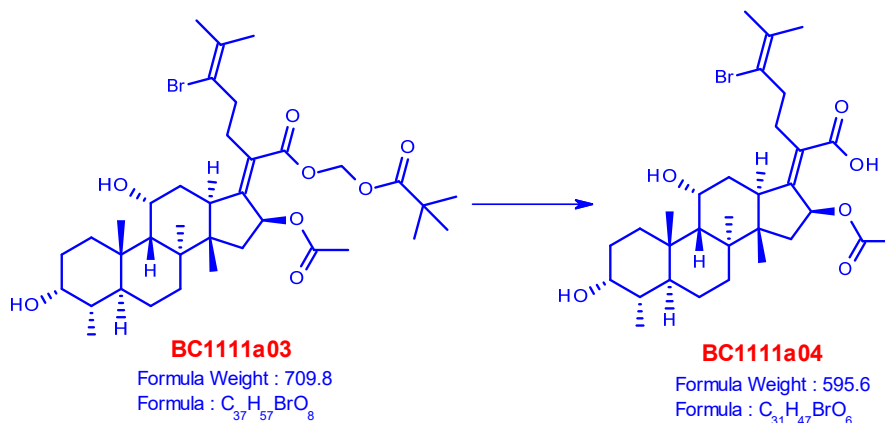

### 2.2.4.1 General comment

A main impurity with similar polarity to the product couldn't be removed by silica gel column chromatography. Then the product was tried to be purified by recrystallization using EA/Toluene as solvent according to the patent but failed. Later, the product was treated with DCM/MeOH/PE and most of the impurity was precipitated and removed by filtration.

After then the filtrate was concentrated to give the product with better purity which was further purified by preparative HPLC.

**Reference:**

Patent: WO2005/007669A1

**2.2.4.2 Experimental Procedure**

**Lab Journal No.: JIANL-191-001**

**Experiment No.: JIBC1111a04-003**

Under Argon atmosphere, to a solution of  
3.26 g of BC111a03 (note 1, 4.59 mmol, 1.0 eq.) and  
0.32 g of DBU (note 2, 2.11 mmol, 0.46 eq.) in  
40 mL of MeOH (note 3) was added dropwise a mixed solution of  
25 mL of MeOH (note 3) and  
25 mL of H<sub>2</sub>O over 1 hour. Then the mixture was stirred at 20°C for 5 hours.  
Then the mixture was acidified with 1.0 M aqueous solution of KH<sub>2</sub>PO<sub>4</sub>  
until pH=4-5. The resulting mixture was extracted with  
100 mLX3 of EA. The combined organic phases were washed with  
60 mL of H<sub>2</sub>O and  
60 mLX2 of brine successively, dried over Na<sub>2</sub>SO<sub>4</sub>, and concentrated under  
vacuum. The residue was purified by silica gel column chromatography  
(Eluent: PE/EA/HCOOH=50/50/0.5) to give  
2.30 g of the product as white solid. The resulting solid was dissolved in  
5 mL of DCM and  
1 mL of MeOH followed by dropwise addition of  
30 mL of PE at 20°C. Most of the impurity was precipitated and then removed by  
filtration. Then the filtrate was concentrated to give  
0.70 g of the desired product with better purity which was further purified by  
preparative HPLC (note 4) to give  
0.27 g of the pure product as a white solid.

**Product:** 270 mg

**Yield:** 9.9%

### Notes

1. JIANL-190-1
2. SY-001471
3. SCRC
4. Prep. HPLC condition:  
Pump A: Water with 0.1% TFA  
Pump B: Acetonitrile  
Column: Atlantis® Prep T3 OBD™ 19×150mm 5µm  
Column temp: rt  
Detection:  $\lambda = 210\text{nm}$   
Flow: 14 mL/min  
Gradient program:

| Step | Time (min) | Phase A (%) | Phase B (%) | Comments        |
|------|------------|-------------|-------------|-----------------|
| 1    | 0.0        | 80          | 20          | Linear gradient |
| 2    | 11.0       | 40          | 60          |                 |
| 3    | 11.1       | 40          | 60          |                 |
| 4    | 15.0       | 0           | 100         |                 |

### Analytical Methods

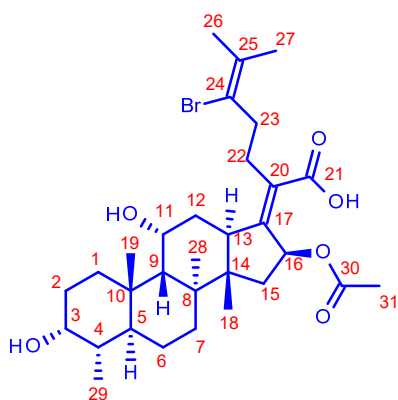

$^1\text{H NMR}$  (400 MHz,  $\text{CDCl}_3$ )  $\delta$  ppm: (some EA was left in the sample) 8.02 (s, 1H,  $\text{COOH}$ ), 5.88 (d,  $J=8.4\text{Hz}$ , 1H, H-16), 4.38 (s, 1H, H-3), 3.76 (s, 1H, H-11), 3.08 (d,

$J=11.2\text{Hz}$ , 1H, H-13), 2.48-2.80 (m, 4H, H-22, 23), 2.00-2.22 (m, 4H, H-4, 2(1H), 12(1H), 15(1H)), 1.97 (s, 3H, H-31), 1.83 (s, 3H, H-26), 1.76 (s, 3H, H-27), 1.78-1.93, 1.70-1.78 and 1.46-1.65 (3m, 8H, H-1(1H), 2(1H), 5, 6, 7(1H), 12(1H), 15(1H)), 1.37 (s, 3H, H-28), 1.26-1.35 (m, 1H, H-9), 1.03-1.18 (m, 2H, H-1(1H), 7(1H)), 0.98 (s, 3H, H-18), 0.87-0.95 (m, 6H, H-19, 29)

$^{13}\text{C}$  NMR (400 MHz,  $\text{CDCl}_3$ )  $\delta$  ppm: 173.6 (C-21), 170.3 (C-30), 151.8 (C-17), 130.9 (C-25), 127.7 (C-20), 119.7 (C-24), 74.0 (C-16), 71.1 (C-3), 67.7 (C-11), 48.9 (C-9), 48.2 (C-14), 44.0 (C-15), 39.0, 38.4 and 37.4 (C-5, 8, 13), 36.3, 36.1 and 35.2 (C-4, 12, 23), 31.3, 29.5 and 29.2 (C-1, 2, 7), 27.4 (C-10), 24.8, 23.2 and 22.8 (C-6, 19, 22), 20.6, 20.5 and 20.2 (C-18, 28, 31), 17.3 (C-26, 27), 15.5 (C-29)

### 2.2.4.3 Analytical data

#### $^1\text{H}$ NMR analysis: Varian: MercuryPlus-400M

Solvent:  $\text{CDCl}_3$

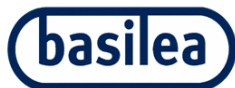

PHARMACEUTICA  
Proposed Structure:

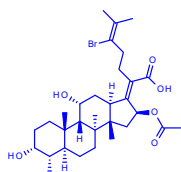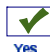

Yes

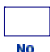

No

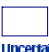

Uncertain

Solvent:  $\text{CDCl}_3$   
 Producer: JIANG  
 Analyst: ALAN  
 Date: 20191126  
 Analyte No: AN1901019999  
 Comment: GAO1  
 ELN No: JIANG\_191\_1

## NMR of BC1111a04

BC<sup>1111</sup> DI<sub>3</sub>

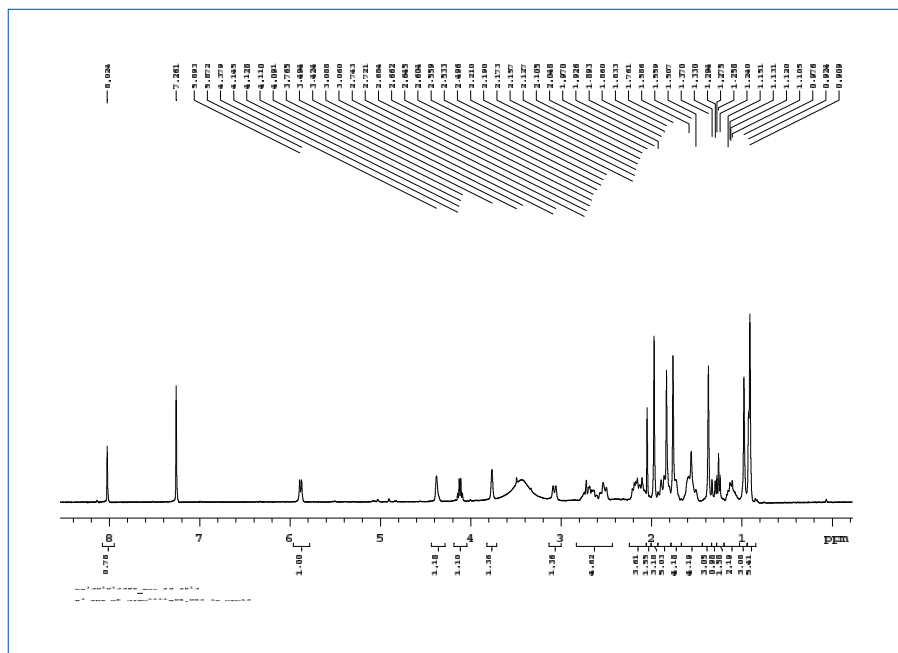



**<sup>13</sup>C NMR analysis: Bruker: AVANCE III 400**

Solvent: CDCl<sub>3</sub>

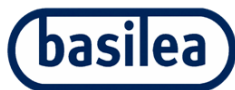

PHARMACEUTICA  
Proposed Structure:

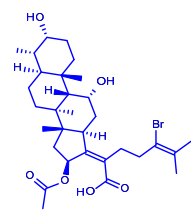

Yes     No     Uncertain

Solvent: CDCl<sub>3</sub>  
 Professor: JIAN L  
 Analyst: Peeters  
 Date: 2013-12-10  
 Analyst No: AN1301028960\_C10  
 Comment: GAGS  
 ELN No: JIANL\_1213

**<sup>13</sup>C-NMR of BC1111a04**

BC<sup>1111</sup> DIV<sub>3</sub>

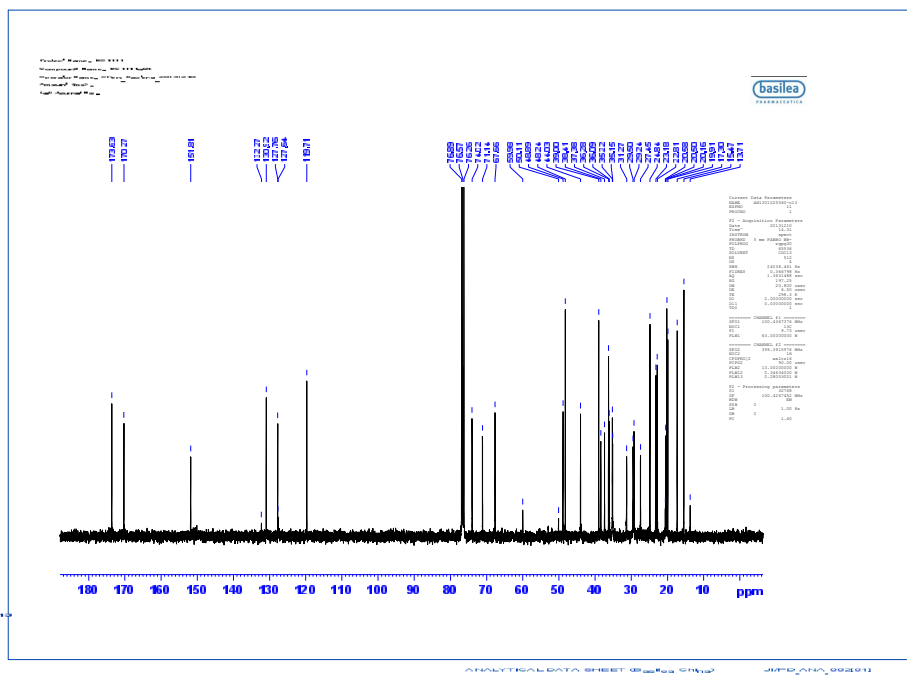

**2.2.5 Synthesis of BAL0117224 (BC1111)**

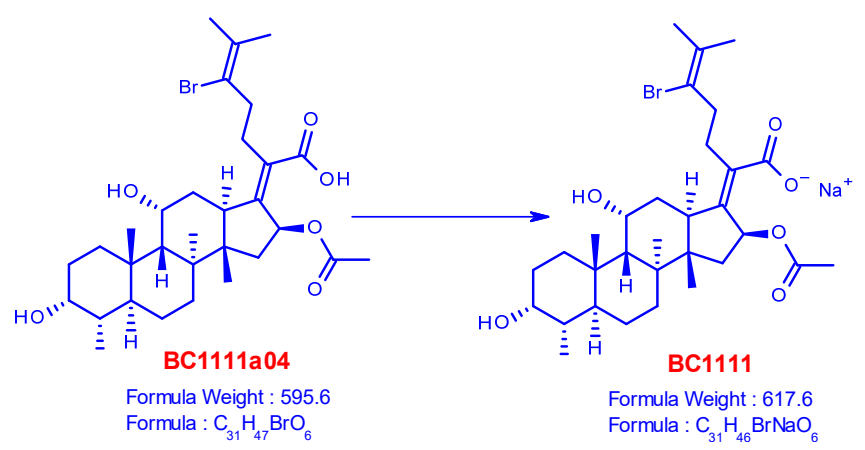

**2.2.5.1 General comment**

**Reference:**

Patent: WO2005/007669A1

### 2.2.5.2 Experimental Procedure

Lab Journal No.: JIANL-199-1

Experiment No.: JIBC1111-001

To a solution of  
80 mg of BC1111a04 (note 1, 0.13 mmol, 1.0 eq.) in  
1.0 mL of MeOH (note 2) was added a solution of  
0.13 mL of 1.0 M aqueous solution of NaOH (note 3, 0.13 mmol, 1.0 eq.) at  
20°C. The resulting solution was concentrated and the residue was  
dissolved in  
5 mL of EtOH (note 4) followed by dropwise addition of  
5 mL of EA (note 5) at 20°C, but no precipitate formed. Then the resulting  
mixture was concentrated under reduced pressure until about 2 mL of  
oily residue was left. Then  
5 mL of EA (note 5) was added at 20°C and a lot of white precipitate formed.  
The white solid was collected by filtration and then dissolved in  
1 mL of ACN and  
5 mL of H<sub>2</sub>O. The resultant mixture was lyophilized to afford  
67 mg of the product as a white solid.

**Product:** 67 mg

**Yield:** 80.7%

**Purity:** 92.3% (210 nm)

#### **Notes**

1. JIANL-191-1
2. SCRC
3. SCRC
4. SCRC
5. SCRC

## Analytical Methods

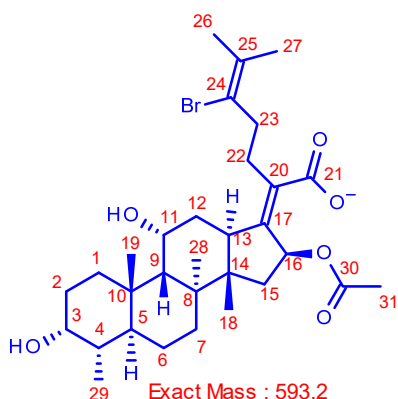

**<sup>1</sup>H NMR** (400 MHz, DMSO-d<sub>6</sub>+D<sub>2</sub>O) δ ppm: 5.61 (d, *J*=8.0Hz, 1H, H-16), 4.11 (s, 1H, H-3), 3.50 (s, 1H, H-11), 2.80 (d, *J*=11.2Hz, 1H, H-13), 2.65-2.75 (m, 1H, H-4), 2.40-2.50, 2.13-2.38 and 2.00-2.10 (3m, 6H, H-22, 23, 2(1H), 12(1H)), 1.85 (s, 3H, H-31), 1.75 and 1.77 (2s, 6H, H-26, 27), 1.82-1.92 and 1.56-1.70 (2m, 4H, H-15, 2(1H), 12(1H)), 1.28-1.55 and 0.93-1.10 (2m, 8H, H-1, 5, 6, 7, 9), 1.24 (s, 3H, H-28), 0.87 (s, 3H, H-18), 0.80 (s, 3H, H-19), 0.78 (d, *J*=6.4Hz, 3H, H-29)

**MS** m/z (-ESI): 593.4/595.6 ([M-H]<sup>-</sup>, 68%/100%).

**HPLC**: Rt =22.86 min (Purity: 88.5% at 254 nm, 91.5% at 230 nm, and 92.3% at 210 nm).

### 2.2.5.3 Analytical data

**<sup>1</sup>H NMR analysis: Bruker: AVANCE III 400**

Solvent: d<sub>6</sub>-DMSO

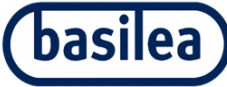

# NMR of BAL0117224-001-001 (BC1111)

PHARMACEUTICA  
Proposed Structure:

BC<sup>1111</sup> DIV<sub>3</sub>

Project Name= BC1111  
Compound Name= BC1111  
Operator Name= Chen\_Baoteng\_20131204  
Amount (mg) =  
Lab Journal No =

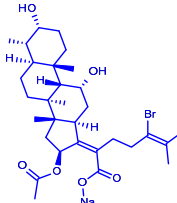

Yes     No     Uncertain

Solvent: DMSO-d<sub>6</sub>  
 Producer: JIAN L  
 Analyst: Baoteng  
 Date: 20131204  
 Analyst No: AN1301028428  
 Comment: GAG2  
 ELN No: JIANL\_193\_1

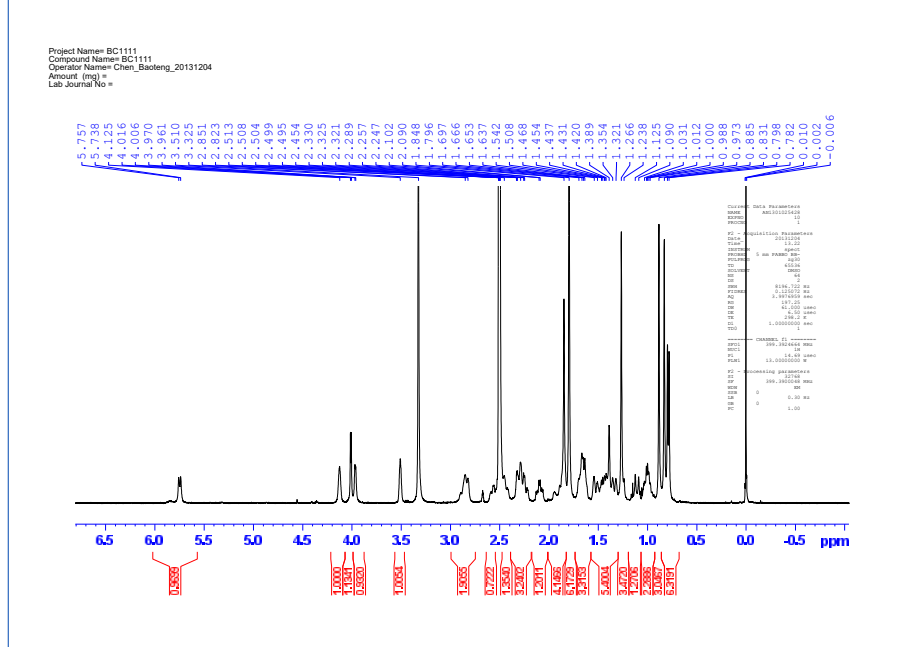

ANALYTICAL DATA SHEET (Basilea China) JI/PD-ANA-002[01]

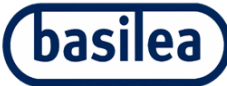

# NMR of BAL0117224-001-001 (BC1111)

PHARMACEUTICA  
Proposed Structure:

BC<sup>1111</sup> DIV<sub>3</sub>

Project Name= BC1111  
Compound Name= BC1111  
Operator Name= Chen\_Baoteng\_20131204  
Amount (mg) =  
Lab Journal No =

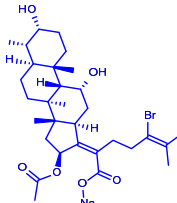

Yes     No     Uncertain

Solvent: DMSO-d<sub>6</sub>  
 Producer: JIAN L  
 Analyst: Baoteng  
 Date: 20131204  
 Analyst No: AN1301028428  
 Comment: GAG2  
 ELN No: JIANL\_193\_1

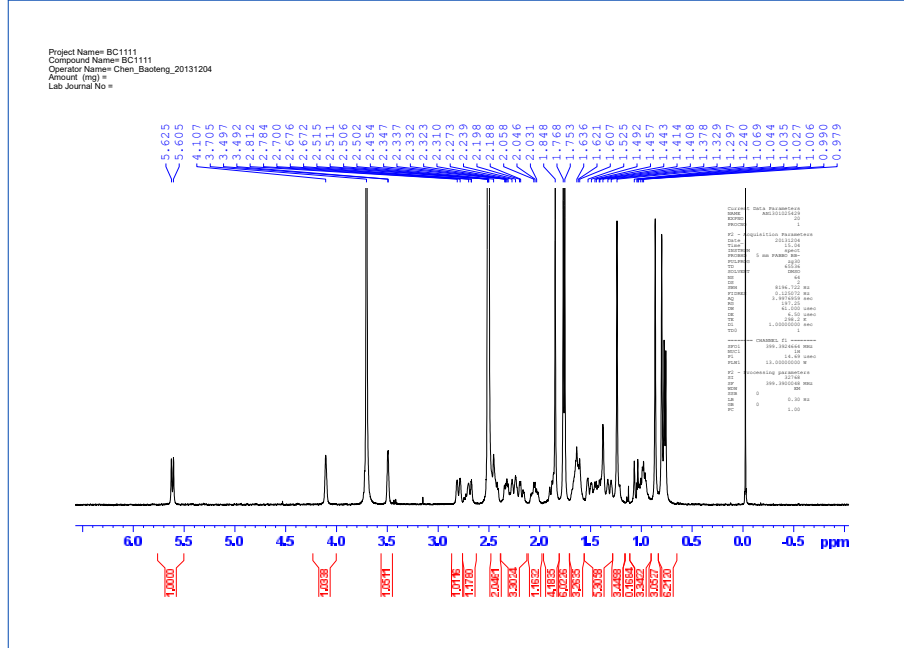

ANALYTICAL DATA SHEET (Basilea China) JI/PD-ANA-002[01]

# LC-MS analysis: Method A

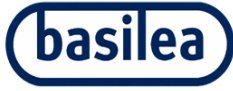

PHARMACEUTICA  
Proposed Structure:

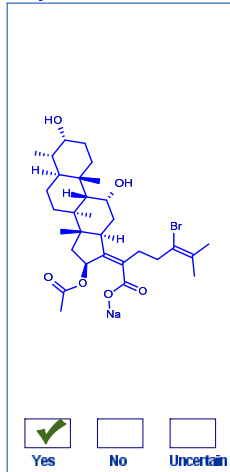

Exact Mass: 618.2  
Prepared: JIANL  
Analyst: WILLY SHAO  
Date: 20131204  
Analysis No: AN1303030276-01  
Comment: CAPS  
SMP No.: JIANL\_132\_1

## LC-MS of BAL0117224-001-001 (BC1111)

BC1111 DIV 3

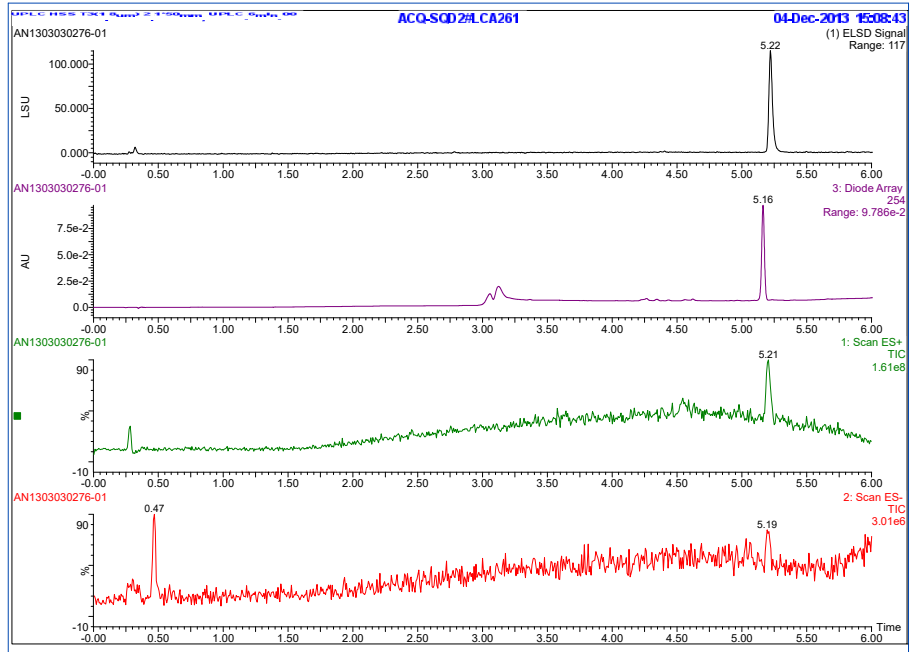

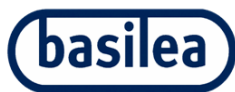

PHARMACEUTICA

Proposed Structure:

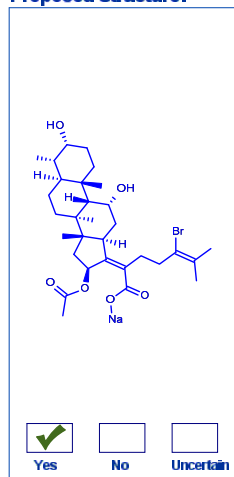

Exact Mass: 318.2  
Producer: JIANL  
Analyte: WIPU\_282  
Date: 20121204  
Analyte No.: AN13030276  
Comment: 0492  
ELN No.: JIANL\_185\_1

# <sup>13</sup>CMS of BAL0117224-001-001 (BC1111)

BC<sup>1111</sup> DIV\_3

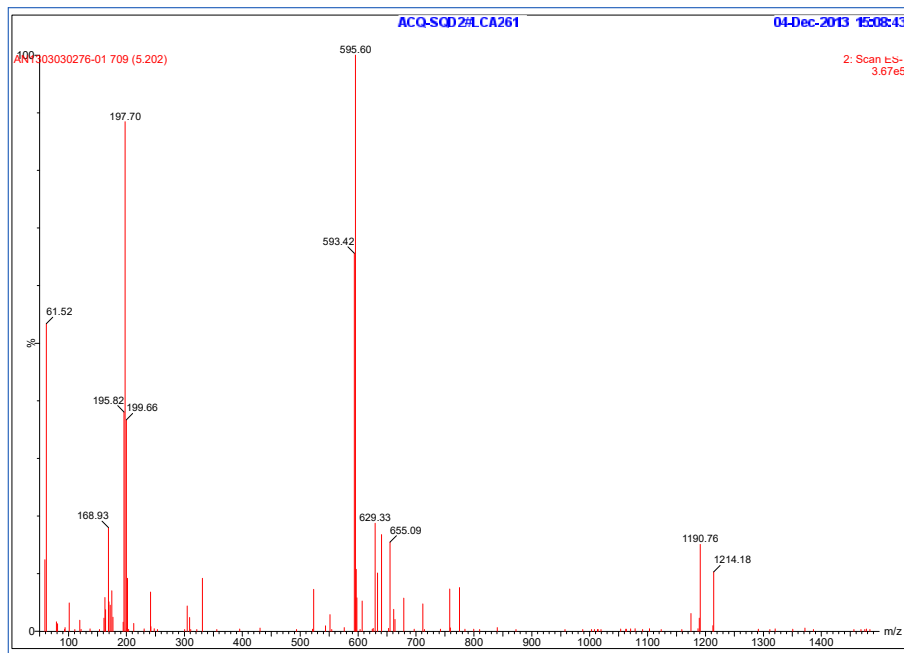

ANALYTICAL DATA SHEET (Basilea China) JI/PD-ANA-002[01]

HPLC: Method D

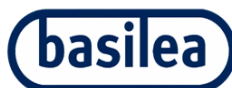

# HPLC of BAL0117224-001-001 (BC1111)

PHARMACEUTICA

BC<sup>1111</sup> Div<sub>3</sub>

Proposed Structure:

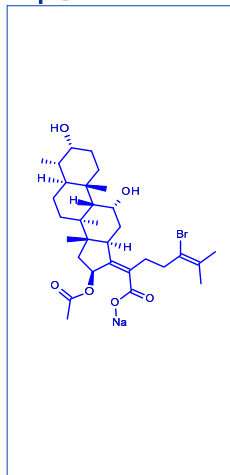

Solvent: ACN:H2O  
 Producer: JIANL  
 Analyst: Sara Ma  
 Date: 20131204  
 Analyst No.: AN1302212940  
 Comment: QA02  
 ELN No.: JIANL\_193\_1

Data file : C:\CHEM32\1\DATA\20131204\AN1302212940.D  
 Injection Date: 12/4/2013 3:42:48 PM  
 Sample Name: BC1111  
 Concentration: 0.400mg/ml  
 Inj. Vol. : 8 µl 03:42:-->  
 Acq. Method : C:\CHEM32\1\METHODS\89-4TFA-2.M  
 Column : sun fire 4.6\*150 3.5

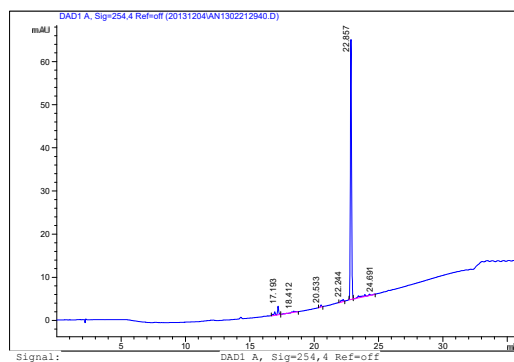

Area Percent Report

| R.T. [min] | Width [min] | Area    | Area %          |
|------------|-------------|---------|-----------------|
| 17.183     | 0.156       | 19.040  | 4.397           |
| 18.412     | 0.268       | 5.184   | 1.197           |
| 20.533     | 0.100       | 3.003   | 0.693           |
| 22.244     | 0.208       | 6.521   | 1.506           |
| 22.857     | 0.106       | 383.096 | 88.474          |
| 24.691     | 2.150       | 16.161  | 3.732           |
| :          |             |         | 433.006 100.000 |

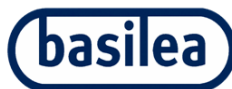

# HPLC of BAL0117224-001-001 (BC1111)

PHARMACEUTICA

BC<sup>1111</sup> Div<sub>3</sub>

Proposed Structure:

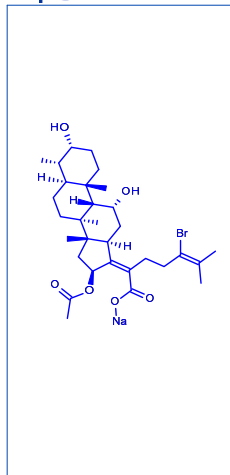

Solvent: ACN:H2O  
 Producer: JIANL  
 Analyst: Sara Ma  
 Date: 20131204  
 Analyst No.: AN1302212940  
 Comment: QA02  
 ELN No.: JIANL\_193\_1

Data file : C:\CHEM32\1\DATA\20131204\AN1302212940.D  
 Injection Date: 12/4/2013 3:42:48 PM  
 Sample Name: BC1111  
 Concentration: 0.400mg/ml  
 Inj. Vol. : 8 µl 03:42:-->  
 Acq. Method : C:\CHEM32\1\METHODS\89-4TFA-2.M  
 Column : sun fire 4.6\*150 3.5

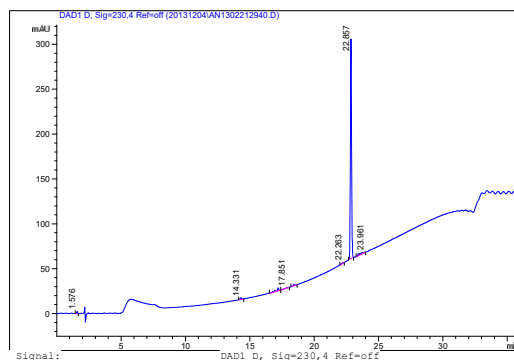

Area Percent Report

| R.T. [min] | Width [min] | Area     | Area %           |
|------------|-------------|----------|------------------|
| 1.576      | 0.102       | 15.610   | 0.924            |
| 14.331     | 0.168       | 17.997   | 1.065            |
| 17.194     | 0.188       | 39.711   | 2.351            |
| 17.851     | 0.158       | 4.403    | 0.261            |
| 18.415     | 0.119       | 11.127   | 0.659            |
| 22.263     | 0.223       | 10.961   | 0.649            |
| 22.857     | 0.105       | 1546.216 | 91.524           |
| 23.961     | 2.119       | 43.383   | 2.568            |
| :          |             |          | 1689.407 100.000 |



# HPLC of BAL0117224-001-001 (BC1111)

PHARMACEUTICA

BC<sup>1111</sup> DIV\_3

Proposed Structure:

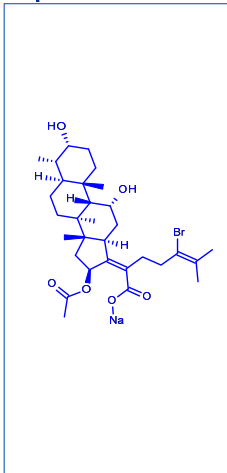

Solvent: ACN+H<sub>2</sub>O  
 Frequency: JIANL  
 Analyst: Sara Ma  
 Date: 20131204  
 Analyst No: AN1302212940  
 Comment: 0A02  
 BLN No: JIANL\_199\_1

Data file : C:\CHEM32\1\DATA\20131204\AN1302212940.D  
 Injection Date: 12/4/2013 3:42:48 PM  
 Sample Name: BC1111  
 Concentration: 0.400mg/ml  
 Inj. Vol. : 8 µl 03:42:->  
 Acq. Method : C:\CHEM32\1\METHODS\89-4TFA-2.M  
 Column : sun fire 4.6\*150 3.5

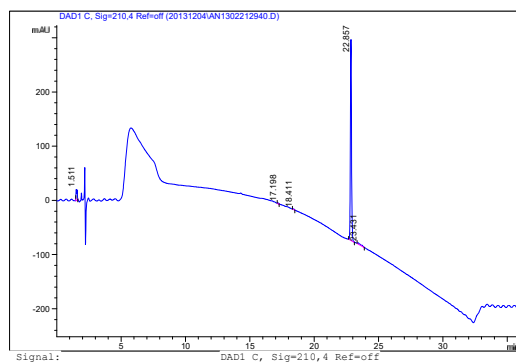

Area Percent Report

| R.T. [min] | Width [min] | Area     | Area %  |
|------------|-------------|----------|---------|
| 1.511      | 0.100       | 124.114  | 4.846   |
| 17.198     | 0.103       | 13.130   | 0.513   |
| 18.411     | 0.105       | 10.371   | 0.405   |
| 22.857     | 0.106       | 2363.891 | 92.289  |
| 22.431     | 0.316       | 49.899   | 1.948   |
|            |             | 2561.405 | 100.000 |



### 3. Conclusion

The delivered target compounds were listed in the following table.

| Compounds                      | Batch No.   | Analytical No.                                                                                                 |
|--------------------------------|-------------|----------------------------------------------------------------------------------------------------------------|
| BAL0117224-001-001<br>(BC1111) | JIANL-199-1 | <sup>1</sup> HNMR: AN1301025428<br><sup>1</sup> HNMR: AN1301025429<br>HPLC: AN1302212940<br>LCMS: AN1303030276 |
| BAL0117224-001-002<br>(BC1111) | JIANL-206-1 | <sup>1</sup> HNMR: AN1301025575<br><sup>1</sup> HNMR: AN1301025576<br>HPLC: AN1302213052<br>LCMS: AN1303030304 |

## 4. Batch tracking

### 4.1 Synthesis of BC1111a01

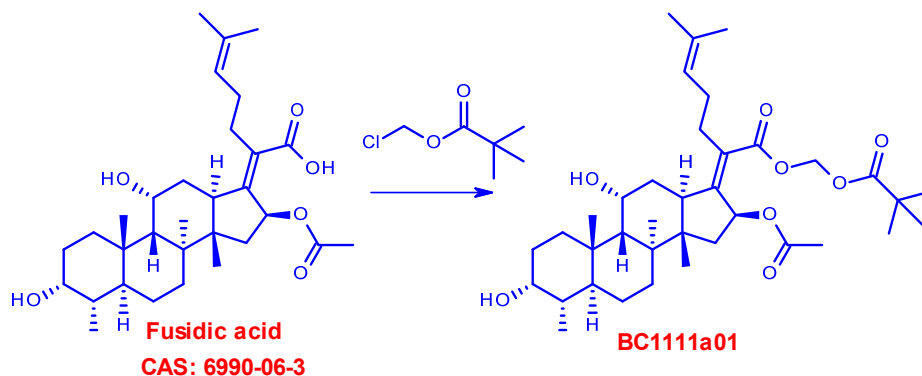

#### Reaction conditions:

| Experiment No.  | Date      | Fusidic acid     |       |       | Chloromethyl pivalate |           | TEA  |           | DMF | Temp. | Time |
|-----------------|-----------|------------------|-------|-------|-----------------------|-----------|------|-----------|-----|-------|------|
|                 |           | Batch No.        | g     | mmol  | g                     | mmol/eq.  | g    | mmol/eq.  |     |       |      |
| JIBC1111a01-001 | 11/3/2013 | industrial grade | 13.01 | 25.18 | 5.31                  | 35.26/1.4 | 3.31 | 32.74/1.3 | 38  | 50    | 18   |

#### Results:

| Experiment No.  | Batch No.   | Date      | crude product   |      |     |      | pure product |                 |      |     |                  |       |      |
|-----------------|-------------|-----------|-----------------|------|-----|------|--------------|-----------------|------|-----|------------------|-------|------|
|                 |             |           | Analytical date |      |     | Qty. | Yield        | Analytical date |      |     | Qty.             | Yield |      |
|                 |             |           | HPLC            | LCMS | NMR | mg   | %            | HPLC            | LCMS | NMR | g                | %     |      |
| JIBC1111a01-001 | JIANL-180-1 | 11/4/2013 |                 |      |     |      |              |                 |      |     | AN13010<br>13192 | 13.65 | 85.9 |

### 4.2 Synthesis of BC1111a02

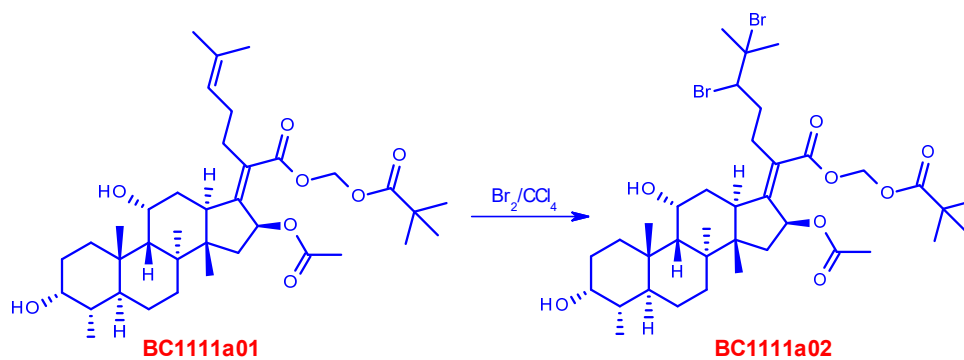

#### Reaction conditions:

| Experiment No.  | Date       | BC1111a01   |      |       | Br <sub>2</sub> |          | CCl <sub>4</sub> | Temp. | Time |
|-----------------|------------|-------------|------|-------|-----------------|----------|------------------|-------|------|
|                 |            | Batch No.   | g    | mmol  | g               | mmol/eq. |                  |       |      |
| JIBC1111a02-001 | 11/5/2013  | JIANL-180-1 | 3.01 | 4.77  | 0.84            | 5.25/1.1 | 40               | 0     | 2    |
| JIBC1111a02-002 | 11/11/2013 | JIANL-180-1 | 3.02 | 4.78  | 0.84            | 5.26/1.1 | 40               | -10   | 2    |
| JIBC1111a02-003 | 11/21/2013 | JIANL-180-1 | 7.15 | 11.30 | 2.00            | 12.5/1.1 | 80               | -10   | 2    |

**Results:**

| Experiment No.  | Batch No.   | Date       | crude product   |      |     |      | pure product |                 |                  |       |      |       |
|-----------------|-------------|------------|-----------------|------|-----|------|--------------|-----------------|------------------|-------|------|-------|
|                 |             |            | Analytical date |      |     | Qty. | Yield        | Analytical date |                  |       | Qty. | Yield |
|                 |             |            | HPLC            | LCMS | NMR | g    | %            | HPLC            | LCMS             | NMR   | g    | %     |
| JIBC1111a02-001 | JIANL-181-1 | 11/5/2013  |                 |      |     |      |              |                 | AN130101<br>3193 | 1.783 | 47.2 |       |
| JIBC1111a02-002 | JIANL-184-1 | 11/11/2013 |                 |      |     | 3.78 | 100.0        |                 |                  |       |      |       |
| JIBC1111a02-003 | JIANL-189-1 | 11/21/2013 |                 |      |     | 8.95 | 100.0        |                 |                  |       |      |       |

**4.3 Synthesis of BC1111a03**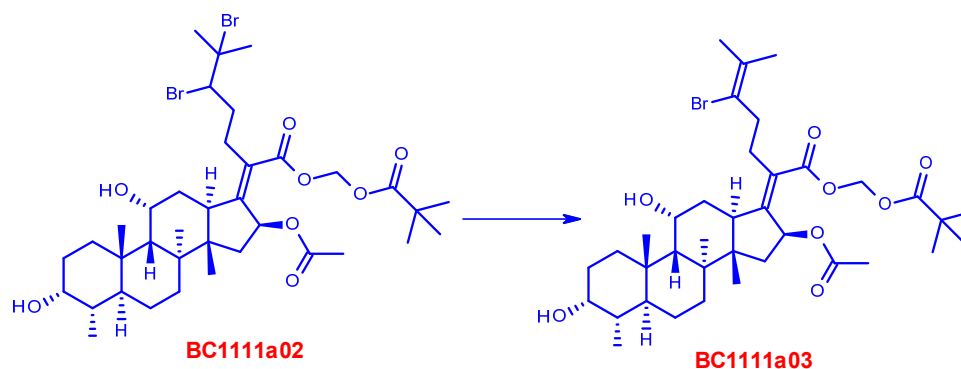**Reaction conditions:**

| Experiment No.  | Date       | BC1111a02   |      |      | DBU  |          | CCl <sub>4</sub> | Temp. | Time |
|-----------------|------------|-------------|------|------|------|----------|------------------|-------|------|
|                 |            | Batch No.   | g    | mmol | g    | mmol/eq. | mL               | °C    | hr   |
| JIBC1111a03-001 | 11/5/2013  | JIANL-181-1 | 1.28 | 1.62 | 0.49 | 3.25/2.0 | 20               | 77    | 16   |
| JIBC1111a03-002 | 11/11/2013 | JIANL-184-1 | 3.78 | 4.78 | 1.46 | 9.56/2.0 | 50               | 77    | 16   |
| JIBC1111a03-003 | 11/21/2013 | JIANL-189-1 | 8.95 | 11.3 | 3.46 | 22.6/2.0 | 120              | 77    | 16   |

**Results:**

| Experiment No.  | Batch No.   | Date       | crude product   |      |     |      | pure product |                 |                  |      |      |       |
|-----------------|-------------|------------|-----------------|------|-----|------|--------------|-----------------|------------------|------|------|-------|
|                 |             |            | Analytical date |      |     | Qty. | Yield        | Analytical date |                  |      | Qty. | Yield |
|                 |             |            | HPLC            | LCMS | NMR | mg   | %            | HPLC            | LCMS             | NMR  | g    | %     |
| JIBC1111a03-001 | JIANL-182-1 | 11/6/2013  |                 |      |     |      | failed       |                 |                  |      |      |       |
| JIBC1111a03-002 | JIANL-185-1 | 11/12/2013 |                 |      |     |      |              |                 | AN130101<br>3313 | 1.29 | 38.1 |       |
| JIBC1111a03-003 | JIANL-190-1 | 11/22/2013 |                 |      |     |      |              |                 |                  | 3.26 | 40.6 |       |

**4.4 Synthesis of BC1111a04**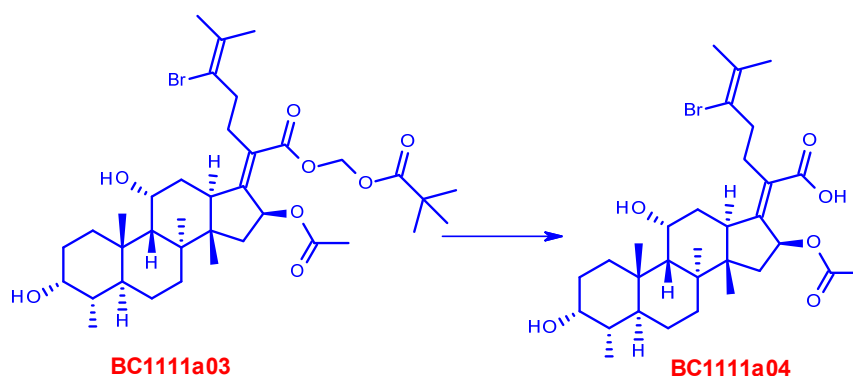

**Reaction conditions:**

| Experiment No.  | Date       | BC1111a03   |      |      | DBU  |           | MeOH | H <sub>2</sub> O | Temp. | Time |
|-----------------|------------|-------------|------|------|------|-----------|------|------------------|-------|------|
|                 |            | Batch No.   | g    | mmol | g    | mmol/eq.  | mL   | mL               | °C    | hr   |
| JIBC1111a04-001 | 11/5/2013  | JIANL-181-1 | 0.45 | 0.63 | 0.05 | 0.33/0.53 | 7.7  | 4                | 20    | 4    |
| JIBC1111a04-002 | 11/13/2013 | JIANL-185-1 | 1.23 | 1.74 | 0.12 | 0.80/0.46 | 22.5 | 12.5             | 20    | 4    |
| JIBC1111a04-003 | 11/21/2013 | JIANL-190-1 | 3.26 | 4.59 | 0.32 | 2.11/0.46 | 65.0 | 25.0             | 20    | 6    |

**Results:**

| Experiment No.  | Batch No.     | Date       | crude product   |                  |                  |      | pure product |                 |                  |                  |      |       |
|-----------------|---------------|------------|-----------------|------------------|------------------|------|--------------|-----------------|------------------|------------------|------|-------|
|                 |               |            | Analytical date |                  |                  | Qty. | Yield        | Analytical date |                  |                  | Qty. | Yield |
|                 |               |            | HPLC            | LCMS             | NMR              | g    | %            | HPLC            | LCMS             | NMR              | g    | %     |
| JIBC1111a04-001 | JIANL-183-001 | 11/7/2013  |                 |                  |                  |      | failed       |                 |                  |                  |      |       |
| JIBC1111a04-002 | JIANL-186-001 | 11/14/2013 |                 | AN130339<br>6701 | AN130101<br>3347 | 1    | 68.9         |                 | AN130339<br>7045 |                  | 0.15 | 14.5  |
| JIBC1111a04-003 | JIANL-191-001 | 11/25/2013 |                 |                  |                  | 2    |              |                 |                  | AN130101<br>3596 | 0.27 | 9.9   |

### 4.5 Synthesis of BAL0117224 (BC1111)

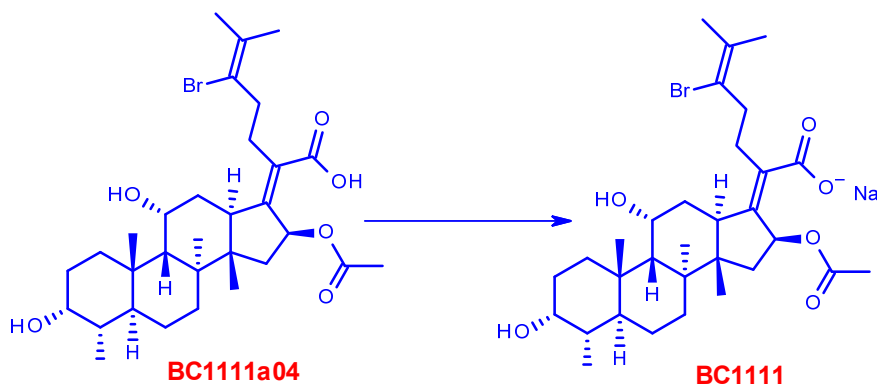

**Reaction conditions:**

| Experiment No. | Date      | BC1111a04   |     |      | NaOH |          | MeOH | H <sub>2</sub> O | Temp. | Time |
|----------------|-----------|-------------|-----|------|------|----------|------|------------------|-------|------|
|                |           | Batch No.   | mg  | mmol | mg   | mmol/eq. | mL   | mL               | °C    | hr   |
| JIBC1111-001   | 12/4/2013 | JIANL-191-1 | 80  | 0.13 | 5    | 0.13/1.0 | 1.0  | 0.134            | 20    | 0    |
| JIBC1111-002   | 12/6/2013 | JIANL-191-1 | 190 | 0.32 | 13   | 0.32/1.0 | 2.4  | 0.319            | 20    | 0    |

**Results:**

| Experiment No. | Batch No.     | Date      | crude product   |      |     |      | pure product |                  |                  |                  |      |       |
|----------------|---------------|-----------|-----------------|------|-----|------|--------------|------------------|------------------|------------------|------|-------|
|                |               |           | Analytical date |      |     | Qty. | Yield        | Analytical date  |                  |                  | Qty. | Yield |
|                |               |           | HPLC            | LCMS | NMR | mg   | %            | HPLC             | LCMS             | NMR              | mg   | %     |
| JIBC1111-001   | JIANL-199-001 | 12/4/2013 |                 |      |     |      |              | AN130221<br>2940 | AN130303<br>0276 | AN130102<br>5428 | 67   | 80.7  |
| JIBC1111-002   | JIANL-206-001 | 12/6/2013 |                 |      |     |      |              | AN130221<br>3052 | AN130303<br>0304 | AN130102<br>5575 | 152  | 77.2  |
